# Supplementary material
Source: PubMed Central journal article supplement (PMC9560300)
Supplement: mmc2.pdf [file mmc2.pdf]

**Supplementary Table 1. List of endogenous metabolites included in the study**

| <b>Metabolite</b>                      | <b>Super pathway</b> | <b>Sub pathway</b>                               | <b>Compound ID</b> | <b>PubChem</b> | <b>KEGG</b> | <b>HMDB</b> |
|----------------------------------------|----------------------|--------------------------------------------------|--------------------|----------------|-------------|-------------|
| 1-methyl-4-imidazoleacetate            | Amino Acid           | Histidine Metabolism                             | 32350              | 75810          | C05828      | HMDB02820   |
| 1-methylhistidine                      | Amino Acid           | Histidine Metabolism                             | 30460              | 92105          | C01152      | HMDB00001   |
| 2-aminoadipate                         | Amino Acid           | Lysine Metabolism                                | 6146               | 469            | C00956      | HMDB00510   |
| 2-aminobutyrate                        | Amino Acid           | Glutathione Metabolism                           | 42374              | 439691         | C02261      | HMDB00650   |
| 2-hydroxy-3-methylvalerate             | Amino Acid           | Leucine, Isoleucine and Valine Metabolism        | 36746              | 164623         | NA          | HMDB00317   |
| 2-hydroxybutyrate/2-hydroxyisobutyrate | Amino Acid           | Glutathione Metabolism                           | 52281              | NA             | NA          | NA          |
| 2-hydroxyphenylacetate                 | Amino Acid           | Tyrosine Metabolism                              | 1432               | 11970          | C05852      | HMDB00669   |
| 2-methylbutyrylcarnitine (C5)          | Amino Acid           | Leucine, Isoleucine and Valine Metabolism        | 45095              | 6426901        | NA          | HMDB00378   |
| 2-oxoarginine*                         | Amino Acid           | Urea cycle; Arginine and Proline Metabolism      | 55072              | 558            | C03771      | HMDB04225   |
| 3-(4-hydroxyphenyl)lactate             | Amino Acid           | Tyrosine Metabolism                              | 32197              | 9378           | C03672      | HMDB00755   |
| 3-hydroxy-2-ethylpropionate            | Amino Acid           | Leucine, Isoleucine and Valine Metabolism        | 32397              | 188979         | NA          | HMDB00396   |
| 3-hydroxyisobutyrate                   | Amino Acid           | Leucine, Isoleucine and Valine Metabolism        | 1549               | 87             | C06001      | HMDB00336   |
| 3-indoxyl sulfate                      | Amino Acid           | Tryptophan Metabolism                            | 27672              | 10258          | NA          | HMDB00682   |
| 3-methoxytyramine sulfate              | Amino Acid           | Tyrosine Metabolism                              | 44618              | NA             | NA          | NA          |
| 3-methoxytyrosine                      | Amino Acid           | Tyrosine Metabolism                              | 12017              | 1670           | NA          | HMDB01434   |
| 3-methyl-2-oxobutyrate                 | Amino Acid           | Leucine, Isoleucine and Valine Metabolism        | 44526              | 49             | C00141      | HMDB00019   |
| 3-methyl-2-oxovalerate                 | Amino Acid           | Leucine, Isoleucine and Valine Metabolism        | 15676              | 47             | C00671      | HMDB03736   |
| 3-methylglutaconate                    | Amino Acid           | Leucine, Isoleucine and Valine Metabolism        | 38667              | 1551553        | NA          | HMDB00522   |
| 3-methylglutaryl carnitine (2)         | Amino Acid           | Leucine, Isoleucine and Valine Metabolism        | 46548              | 128145         | NA          | HMDB00552   |
| 3-methylhistidine                      | Amino Acid           | Histidine Metabolism                             | 15677              | 64969          | C01152      | HMDB00479   |
| 4-acetamidobutanoate                   | Amino Acid           | Polyamine Metabolism                             | 1558               | 18189          | C02946      | HMDB03681   |
| 4-hydroxyglutamate                     | Amino Acid           | Glutamate Metabolism                             | 40499              | 439902         | C03079      | HMDB01344   |
| 4-hydroxyphenylpyruvate                | Amino Acid           | Tyrosine Metabolism                              | 1669               | 979            | C01179      | HMDB00707   |
| 4-methyl-2-oxopentanoate               | Amino Acid           | Leucine, Isoleucine and Valine Metabolism        | 22116              | 70             | C00233      | HMDB00695   |
| 5-methylthioadenosine (MTA)            | Amino Acid           | Polyamine Metabolism                             | 1419               | 439176         | C00170      | HMDB01173   |
| 5-oxoproline                           | Amino Acid           | Glutathione Metabolism                           | 1494               | 7405           | C01879      | HMDB00267   |
| 6-oxopiperidine-2-carboxylate          | Amino Acid           | Lysine Metabolism                                | 43231              | 3014237        | NA          | HMDB61705   |
| alanine                                | Amino Acid           | Alanine and Aspartate Metabolism                 | 1126               | 5950           | C00041      | HMDB00161   |
| alpha-hydroxyisocaproate               | Amino Acid           | Leucine, Isoleucine and Valine Metabolism        | 22132              | 83697          | C03264      | HMDB00746   |
| alpha-hydroxyisovalerate               | Amino Acid           | Leucine, Isoleucine and Valine Metabolism        | 33937              | 99823          | NA          | HMDB00407   |
| alpha-ketobutyrate                     | Amino Acid           | Methionine, Cysteine, SAM and Taurine Metabolism | 4968               | 58             | C00109      | HMDB00005   |

|                                |            |                                                  |       |          |        |           |
|--------------------------------|------------|--------------------------------------------------|-------|----------|--------|-----------|
| argininate*                    | Amino Acid | Urea cycle; Arginine and Proline Metabolism      | 57461 | 160437   | NA     | HMDB03148 |
| arginine                       | Amino Acid | Urea cycle; Arginine and Proline Metabolism      | 1638  | 232      | C00062 | HMDB00517 |
| asparagine                     | Amino Acid | Alanine and Aspartate Metabolism                 | 512   | 6267     | C00152 | HMDB00168 |
| aspartate                      | Amino Acid | Alanine and Aspartate Metabolism                 | 443   | 5960     | C00049 | HMDB00191 |
| beta-citrylglutamate           | Amino Acid | Glutamate Metabolism                             | 54923 | 72715786 | C20775 | NA        |
| beta-hydroxyisovalerate        | Amino Acid | Leucine, Isoleucine and Valine Metabolism        | 12129 | 69362    | NA     | HMDB00754 |
| betaine                        | Amino Acid | Glycine, Serine and Threonine Metabolism         | 3141  | 247      | C00719 | HMDB00043 |
| C-glycosyltryptophan           | Amino Acid | Tryptophan Metabolism                            | 48782 | 10981970 | NA     | NA        |
| carboxyethyl-GABA              | Amino Acid | Glutamate Metabolism                             | 40007 | 2572     | NA     | HMDB02201 |
| citrulline                     | Amino Acid | Urea cycle; Arginine and Proline Metabolism      | 2132  | 9750     | C00327 | HMDB00904 |
| creatine                       | Amino Acid | Creatine Metabolism                              | 27718 | 586      | C00300 | HMDB00064 |
| creatinine                     | Amino Acid | Creatine Metabolism                              | 513   | 588      | C00791 | HMDB00562 |
| cys-gly, oxidized              | Amino Acid | Glutathione Metabolism                           | 18368 | 333293   | NA     | NA        |
| cystathionine                  | Amino Acid | Methionine, Cysteine, SAM and Taurine Metabolism | 15705 | 439258   | C02291 | HMDB00099 |
| cysteine                       | Amino Acid | Methionine, Cysteine, SAM and Taurine Metabolism | 1868  | 5862     | C00097 | HMDB00574 |
| cysteine s-sulfate             | Amino Acid | Methionine, Cysteine, SAM and Taurine Metabolism | 22176 | 115015   | C05824 | HMDB00731 |
| cysteine sulfinic acid         | Amino Acid | Methionine, Cysteine, SAM and Taurine Metabolism | 37443 | 109      | C00606 | HMDB00996 |
| cysteine-glutathione disulfide | Amino Acid | Glutathione Metabolism                           | 35159 | 4247235  | NA     | HMDB00656 |
| cysteinylglycine               | Amino Acid | Glutathione Metabolism                           | 35637 | 439498   | C01419 | HMDB00078 |
| cystine                        | Amino Acid | Methionine, Cysteine, SAM and Taurine Metabolism | 56    | 67678    | C00491 | HMDB00192 |
| dimethylarginine (SDMA + ADMA) | Amino Acid | Urea cycle; Arginine and Proline Metabolism      | 36808 | 123831   | C03626 | HMDB01539 |
| dimethylglycine                | Amino Acid | Glycine, Serine and Threonine Metabolism         | 5086  | 673      | C01026 | HMDB00092 |
| dopamine 3-O-sulfate           | Amino Acid | Tyrosine Metabolism                              | 48407 | 122136   | C13690 | HMDB06275 |
| ethylmalonate                  | Amino Acid | Leucine, Isoleucine and Valine Metabolism        | 15765 | 11756    | NA     | HMDB00622 |
| formiminoglutamate             | Amino Acid | Histidine Metabolism                             | 43493 | 439233   | C00439 | HMDB00854 |
| gentisate                      | Amino Acid | Tyrosine Metabolism                              | 18280 | 3469     | C00628 | HMDB00152 |
| glutamate                      | Amino Acid | Glutamate Metabolism                             | 57    | 611      | C00025 | HMDB00148 |
| glutamine                      | Amino Acid | Glutamate Metabolism                             | 53    | 5961     | C00064 | HMDB00641 |
| glutaryl carnitine (C5-DC)     | Amino Acid | Lysine Metabolism                                | 44664 | 71464488 | NA     | HMDB13130 |
| glycine                        | Amino Acid | Glycine, Serine and Threonine Metabolism         | 58    | 750      | C00037 | HMDB00123 |
| guanidinoacetate               | Amino Acid | Creatine Metabolism                              | 43802 | 763      | C00581 | HMDB00128 |
| histidine                      | Amino Acid | Histidine Metabolism                             | 59    | 6274     | C00135 | HMDB00177 |
| homoarginine                   | Amino Acid | Urea cycle; Arginine and Proline Metabolism      | 22137 | 9085     | C01924 | HMDB00670 |

|                             |            |                                                  |       |          |        |           |
|-----------------------------|------------|--------------------------------------------------|-------|----------|--------|-----------|
| homocitrulline              | Amino Acid | Urea cycle; Arginine and Proline Metabolism      | 22138 | 65072    | C02427 | HMDB00679 |
| hydantoin-5-propionic acid  | Amino Acid | Histidine Metabolism                             | 40473 | 782      | C05565 | HMDB01212 |
| hypotaurine                 | Amino Acid | Methionine, Cysteine, SAM and Taurine Metabolism | 590   | 107812   | C00519 | HMDB00965 |
| imidazole lactate           | Amino Acid | Histidine Metabolism                             | 15716 | 440129   | C05568 | HMDB02320 |
| indole-3-carboxylic acid    | Amino Acid | Tryptophan Metabolism                            | 38116 | 69867    | C19837 | HMDB03320 |
| indoleacetate               | Amino Acid | Tryptophan Metabolism                            | 27513 | 802      | C00954 | HMDB00197 |
| indoleacetylglutamine       | Amino Acid | Tryptophan Metabolism                            | 42087 | 25200879 | NA     | HMDB13240 |
| indolelactate               | Amino Acid | Tryptophan Metabolism                            | 18349 | 92904    | C02043 | HMDB00671 |
| indolepropionate            | Amino Acid | Tryptophan Metabolism                            | 32405 | 3744     | NA     | HMDB02302 |
| isobutyrylcarnitine (C4)    | Amino Acid | Leucine, Isoleucine and Valine Metabolism        | 33441 | 168379   | NA     | HMDB00736 |
| isobutyrylglycine           | Amino Acid | Leucine, Isoleucine and Valine Metabolism        | 35437 | 10855600 | NA     | HMDB00730 |
| isoleucine                  | Amino Acid | Leucine, Isoleucine and Valine Metabolism        | 1125  | 6306     | C00407 | HMDB00172 |
| isovalerate (i5:0)          | Amino Acid | Leucine, Isoleucine and Valine Metabolism        | 44656 | 10430    | C08262 | HMDB00718 |
| isovalerylcarnitine (C5)    | Amino Acid | Leucine, Isoleucine and Valine Metabolism        | 34407 | 6426851  | NA     | HMDB00688 |
| isovalerylglycine           | Amino Acid | Leucine, Isoleucine and Valine Metabolism        | 35107 | 546304   | NA     | HMDB00678 |
| kynurenate                  | Amino Acid | Tryptophan Metabolism                            | 1417  | 3845     | C01717 | HMDB00715 |
| kynurenine                  | Amino Acid | Tryptophan Metabolism                            | 15140 | 161166   | C00328 | HMDB00684 |
| leucine                     | Amino Acid | Leucine, Isoleucine and Valine Metabolism        | 60    | 5246661  | NA     | NA        |
| lysine                      | Amino Acid | Lysine Metabolism                                | 1301  | 5962     | C00047 | HMDB00182 |
| methionine                  | Amino Acid | Methionine, Cysteine, SAM and Taurine Metabolism | 1302  | 6137     | C00073 | HMDB00696 |
| methionine sulfone          | Amino Acid | Methionine, Cysteine, SAM and Taurine Metabolism | 44878 | 69961    | NA     | NA        |
| methionine sulfoxide        | Amino Acid | Methionine, Cysteine, SAM and Taurine Metabolism | 18374 | 158980   | C02989 | HMDB02005 |
| methylsuccinate             | Amino Acid | Leucine, Isoleucine and Valine Metabolism        | 15745 | 10349    | NA     | HMDB01844 |
| N-acetyl-1-methylhistidine* | Amino Acid | Histidine Metabolism                             | 43255 | 193270   | NA     | NA        |
| N-acetylalanine             | Amino Acid | Alanine and Aspartate Metabolism                 | 1585  | 88064    | C02847 | HMDB00766 |
| N-acetylarginine            | Amino Acid | Urea cycle; Arginine and Proline Metabolism      | 33953 | 67427    | C02562 | HMDB04620 |
| N-acetylasparagine          | Amino Acid | Alanine and Aspartate Metabolism                 | 33942 | 99715    | NA     | HMDB06028 |
| N-acetylaspartate (NAA)     | Amino Acid | Alanine and Aspartate Metabolism                 | 22185 | 65065    | C01042 | HMDB00812 |
| N-acetylcarnosine           | Amino Acid | Histidine Metabolism                             | 43488 | 9903482  | NA     | HMDB12881 |
| N-acetylcitrulline          | Amino Acid | Urea cycle; Arginine and Proline Metabolism      | 48434 | 656979   | C15532 | HMDB00856 |
| N-acetylglutamate           | Amino Acid | Glutamate Metabolism                             | 15720 | 70914    | C00624 | HMDB01138 |
| N-acetylglutamine           | Amino Acid | Glutamate Metabolism                             | 33943 | 182230   | C02716 | HMDB06029 |
| N-acetylglycine             | Amino Acid | Glycine, Serine and Threonine Metabolism         | 27710 | 10972    | NA     | HMDB00532 |

|                              |            |                                                  |       |          |        |           |
|------------------------------|------------|--------------------------------------------------|-------|----------|--------|-----------|
| N-acetylhistidine            | Amino Acid | Histidine Metabolism                             | 33946 | 75619    | C02997 | HMDB32055 |
| N-acetylisoleucine           | Amino Acid | Leucine, Isoleucine and Valine Metabolism        | 33967 | 2802421  | NA     | HMDB61684 |
| N-acetylleucine              | Amino Acid | Leucine, Isoleucine and Valine Metabolism        | 1587  | 70912    | C02710 | HMDB11756 |
| N-acetylmethionine           | Amino Acid | Methionine, Cysteine, SAM and Taurine Metabolism | 1589  | 448580   | C02712 | HMDB11745 |
| N-acetylphenylalanine        | Amino Acid | Phenylalanine Metabolism                         | 33950 | 74839    | C03519 | HMDB00512 |
| N-acetylputrescine           | Amino Acid | Polyamine Metabolism                             | 37496 | 122356   | C02714 | HMDB02064 |
| N-acetylserine               | Amino Acid | Glycine, Serine and Threonine Metabolism         | 37076 | 65249    | NA     | HMDB02931 |
| N-acetyltaurine              | Amino Acid | Methionine, Cysteine, SAM and Taurine Metabolism | 48187 | 159864   | NA     | NA        |
| N-acetylthreonine            | Amino Acid | Glycine, Serine and Threonine Metabolism         | 33939 | 152204   | NA     | NA        |
| N-acetyltryptophan           | Amino Acid | Tryptophan Metabolism                            | 33959 | 700653   | C03137 | HMDB13713 |
| N-acetyltyrosine             | Amino Acid | Tyrosine Metabolism                              | 32390 | 68310    | NA     | HMDB00866 |
| N-acetylvaline               | Amino Acid | Leucine, Isoleucine and Valine Metabolism        | 1591  | 66789    | NA     | HMDB11757 |
| N-delta-acetylornithine      | Amino Acid | Urea cycle; Arginine and Proline Metabolism      | 43249 | 9920500  | NA     | NA        |
| N-formylmethionine           | Amino Acid | Methionine, Cysteine, SAM and Taurine Metabolism | 2829  | 439750   | C03145 | HMDB01015 |
| N-methylproline              | Amino Acid | Urea cycle; Arginine and Proline Metabolism      | 37431 | 557      | NA     | NA        |
| N2-acetyllysine              | Amino Acid | Lysine Metabolism                                | 36751 | 92907    | C12989 | HMDB00446 |
| N2,N5-diacetylornithine      | Amino Acid | Urea cycle; Arginine and Proline Metabolism      | 43591 | 10398396 | NA     | NA        |
| N6-acetyllysine              | Amino Acid | Lysine Metabolism                                | 36752 | 92832    | C02727 | HMDB00206 |
| N6,N6,N6-trimethyllysine     | Amino Acid | Lysine Metabolism                                | 1498  | 440120   | C03793 | HMDB01325 |
| ornithine                    | Amino Acid | Urea cycle; Arginine and Proline Metabolism      | 1493  | 6262     | C00077 | HMDB03374 |
| p-cresol glucuronide*        | Amino Acid | Tyrosine Metabolism                              | 48841 | 154035   | NA     | HMDB11686 |
| phenol sulfate               | Amino Acid | Tyrosine Metabolism                              | 32553 | 74426    | C02180 | HMDB60015 |
| phenylalanine                | Amino Acid | Phenylalanine Metabolism                         | 64    | 6140     | C00079 | HMDB00159 |
| phenyllactate (PLA)          | Amino Acid | Phenylalanine Metabolism                         | 22130 | 3848     | C05607 | HMDB00779 |
| phenylpyruvate               | Amino Acid | Phenylalanine Metabolism                         | 566   | 997      | C00166 | HMDB00205 |
| pipecolate                   | Amino Acid | Lysine Metabolism                                | 1444  | 849      | C00408 | HMDB00070 |
| pro-hydroxy-pro              | Amino Acid | Urea cycle; Arginine and Proline Metabolism      | 35127 | 11673055 | NA     | HMDB06695 |
| proline                      | Amino Acid | Urea cycle; Arginine and Proline Metabolism      | 1898  | 145742   | C00148 | HMDB00162 |
| pyroglutamine*               | Amino Acid | Glutamate Metabolism                             | 46225 | 134508   | NA     | NA        |
| S-adenosylhomocysteine (SAH) | Amino Acid | Methionine, Cysteine, SAM and Taurine Metabolism | 42382 | 439155   | C00021 | HMDB00939 |
| S-methylcysteine             | Amino Acid | Methionine, Cysteine, SAM and Taurine Metabolism | 39592 | 24417    | NA     | HMDB02108 |
| S-methylcysteine sulfoxide   | Amino Acid | Methionine, Cysteine, SAM and Taurine Metabolism | 43378 | 82142    | NA     | HMDB29432 |
| S-methylmethionine           | Amino Acid | Methionine, Cysteine, SAM and Taurine Metabolism | 38127 | 458      | C05319 | HMDB38670 |

|                                           |              |                                                      |       |          |        |           |
|-------------------------------------------|--------------|------------------------------------------------------|-------|----------|--------|-----------|
| sarcosine                                 | Amino Acid   | Glycine, Serine and Threonine Metabolism             | 1516  | 1088     | C00213 | HMDB00271 |
| serine                                    | Amino Acid   | Glycine, Serine and Threonine Metabolism             | 1648  | 5951     | C00065 | HMDB00187 |
| serotonin                                 | Amino Acid   | Tryptophan Metabolism                                | 2342  | 5202     | C00780 | HMDB00259 |
| spermidine                                | Amino Acid   | Polyamine Metabolism                                 | 485   | 1102     | C00315 | HMDB01257 |
| taurine                                   | Amino Acid   | Methionine, Cysteine, SAM and Taurine Metabolism     | 2125  | 1123     | C00245 | HMDB00251 |
| threonine                                 | Amino Acid   | Glycine, Serine and Threonine Metabolism             | 1284  | 6288     | C00188 | HMDB00167 |
| thyroxine                                 | Amino Acid   | Tyrosine Metabolism                                  | 2761  | 5819     | C01829 | HMDB01918 |
| tiglylcarnitine (C5:1-DC)                 | Amino Acid   | Leucine, Isoleucine and Valine Metabolism            | 35428 | 22833596 | NA     | HMDB02366 |
| trans-4-hydroxyproline                    | Amino Acid   | Urea cycle; Arginine and Proline Metabolism          | 32306 | 5810     | C01157 | HMDB00725 |
| tryptophan                                | Amino Acid   | Tryptophan Metabolism                                | 54    | 6305     | C00078 | HMDB00929 |
| tryptophan betaine                        | Amino Acid   | Tryptophan Metabolism                                | 37097 | 442106   | C09213 | HMDB61115 |
| tyramine O-sulfate                        | Amino Acid   | Tyrosine Metabolism                                  | 48408 | 153005   | NA     | HMDB06409 |
| tyrosine                                  | Amino Acid   | Tyrosine Metabolism                                  | 1299  | 6057     | C00082 | HMDB00158 |
| urea                                      | Amino Acid   | Urea cycle; Arginine and Proline Metabolism          | 1670  | 1176     | C00086 | HMDB00294 |
| valine                                    | Amino Acid   | Leucine, Isoleucine and Valine Metabolism            | 1649  | 6287     | C00183 | HMDB00883 |
| vanillactate                              | Amino Acid   | Tyrosine Metabolism                                  | 54910 | 160637   | NA     | HMDB00913 |
| vanillylmandelate (VMA)                   | Amino Acid   | Tyrosine Metabolism                                  | 1567  | 1245     | C05584 | HMDB00291 |
| xanthurenate                              | Amino Acid   | Tryptophan Metabolism                                | 15679 | 5699     | C02470 | HMDB00881 |
| 1,5-anhydroglucitol (1,5-AG)              | Carbohydrate | Glycolysis, Gluconeogenesis, and Pyruvate Metabolism | 20675 | 64960    | C07326 | HMDB02712 |
| arabitol/xylitol                          | Carbohydrate | Pentose Metabolism                                   | 48885 | 6912     | C01904 | NA        |
| arabonate/xylonate                        | Carbohydrate | Pentose Metabolism                                   | 48255 | NA       | NA     | NA        |
| erythronate*                              | Carbohydrate | Aminosugar Metabolism                                | 42420 | 2781043  | NA     | HMDB00613 |
| fructose                                  | Carbohydrate | Fructose, Mannose and Galactose Metabolism           | 48195 | 5984     | C00095 | HMDB00660 |
| glucose                                   | Carbohydrate | Glycolysis, Gluconeogenesis, and Pyruvate Metabolism | 20488 | 79025    | C00031 | HMDB00122 |
| glucuronate                               | Carbohydrate | Aminosugar Metabolism                                | 15443 | 444791   | C00191 | HMDB00127 |
| glycerate                                 | Carbohydrate | Glycolysis, Gluconeogenesis, and Pyruvate Metabolism | 1572  | 752      | C00258 | HMDB00139 |
| lactate                                   | Carbohydrate | Glycolysis, Gluconeogenesis, and Pyruvate Metabolism | 527   | 612      | C00186 | HMDB00190 |
| maltose                                   | Carbohydrate | Glycogen Metabolism                                  | 15586 | 10991489 | C00208 | HMDB00163 |
| maltotriose                               | Carbohydrate | Glycogen Metabolism                                  | 44688 | 439586   | C01835 | HMDB01262 |
| mannitol/sorbitol                         | Carbohydrate | Fructose, Mannose and Galactose Metabolism           | 46142 | 5780     | C00794 | HMDB00247 |
| mannose                                   | Carbohydrate | Fructose, Mannose and Galactose Metabolism           | 48153 | 18950    | C00159 | HMDB00169 |
| N-acetylglucosamine/N-acetylgalactosamine | Carbohydrate | Aminosugar Metabolism                                | 46539 | 24139    | NA     | HMDB00215 |
| N-acetylneuraminate                       | Carbohydrate | Aminosugar Metabolism                                | 32377 | 439197   | C00270 | HMDB00230 |

|                                                        |                        |                                                      |       |          |        |           |
|--------------------------------------------------------|------------------------|------------------------------------------------------|-------|----------|--------|-----------|
| pyruvate                                               | Carbohydrate           | Glycolysis, Gluconeogenesis, and Pyruvate Metabolism | 42582 | 1060     | C00022 | HMDB00243 |
| ribitol                                                | Carbohydrate           | Pentose Metabolism                                   | 15772 | 6912     | C00474 | HMDB00508 |
| ribonate                                               | Carbohydrate           | Pentose Metabolism                                   | 27731 | 5460677  | C01685 | HMDB00867 |
| 1-methylnicotinamide                                   | Cofactors and Vitamins | Nicotinate and Nicotinamide Metabolism               | 27665 | 10129985 | C02918 | HMDB00699 |
| alpha-tocopherol                                       | Cofactors and Vitamins | Tocopherol Metabolism                                | 1561  | 14985    | C02477 | HMDB01893 |
| beta-cryptoxanthin                                     | Cofactors and Vitamins | Vitamin A Metabolism                                 | 57591 | 6384256  | NA     | HMDB33844 |
| bilirubin (E,E)*                                       | Cofactors and Vitamins | Hemoglobin and Porphyrin Metabolism                  | 32586 | 5315454  | NA     | NA        |
| bilirubin (E,Z or Z,E)*                                | Cofactors and Vitamins | Hemoglobin and Porphyrin Metabolism                  | 47886 | 5799469  | NA     | HMDB00488 |
| bilirubin (Z,Z)                                        | Cofactors and Vitamins | Hemoglobin and Porphyrin Metabolism                  | 43807 | 5280352  | C00486 | HMDB00054 |
| biliverdin                                             | Cofactors and Vitamins | Hemoglobin and Porphyrin Metabolism                  | 2137  | 5353439  | C00500 | HMDB01008 |
| gamma-CEHC                                             | Cofactors and Vitamins | Tocopherol Metabolism                                | 44876 | 133098   | NA     | HMDB01931 |
| gamma-tocopherol/beta-tocopherol                       | Cofactors and Vitamins | Tocopherol Metabolism                                | 52473 | NA       | NA     | NA        |
| gulonate*                                              | Cofactors and Vitamins | Ascorbate and Aldarate Metabolism                    | 46957 | 9794176  | C00257 | HMDB03290 |
| N1-Methyl-2-pyridone-5-carboxamide                     | Cofactors and Vitamins | Nicotinate and Nicotinamide Metabolism               | 40469 | 69698    | C05842 | HMDB04193 |
| nicotinamide                                           | Cofactors and Vitamins | Nicotinate and Nicotinamide Metabolism               | 594   | 936      | C00153 | HMDB01406 |
| oxalate (ethanedioate)                                 | Cofactors and Vitamins | Ascorbate and Aldarate Metabolism                    | 20694 | 971      | C00209 | HMDB02329 |
| pantothenate                                           | Cofactors and Vitamins | Pantothenate and CoA Metabolism                      | 1508  | 6613     | C00864 | HMDB00210 |
| pyridoxate                                             | Cofactors and Vitamins | Vitamin B6 Metabolism                                | 31555 | 6723     | C00847 | HMDB00017 |
| quinolinate                                            | Cofactors and Vitamins | Nicotinate and Nicotinamide Metabolism               | 1899  | 1066     | C03722 | HMDB00232 |
| retinol (Vitamin A)                                    | Cofactors and Vitamins | Vitamin A Metabolism                                 | 1806  | 445354   | C00473 | HMDB00305 |
| threonate                                              | Cofactors and Vitamins | Ascorbate and Aldarate Metabolism                    | 27738 | 151152   | C01620 | HMDB00943 |
| trigonelline (N'-methylnicotinate)                     | Cofactors and Vitamins | Nicotinate and Nicotinamide Metabolism               | 32401 | 5570     | C01004 | HMDB00875 |
| 2-methylcitrate/homocitrate                            | Energy                 | TCA Cycle                                            | 52282 | NA       | NA     | NA        |
| aconitate [cis or trans]                               | Energy                 | TCA Cycle                                            | 46173 | NA       | NA     | NA        |
| alpha-ketoglutarate                                    | Energy                 | TCA Cycle                                            | 528   | 51       | C00026 | HMDB00208 |
| citrate                                                | Energy                 | TCA Cycle                                            | 1564  | 311      | C00158 | HMDB00094 |
| malate                                                 | Energy                 | TCA Cycle                                            | 1303  | 525      | C00149 | HMDB00156 |
| phosphate                                              | Energy                 | Oxidative Phosphorylation                            | 42109 | 1061     | C00009 | HMDB01429 |
| succinate                                              | Energy                 | TCA Cycle                                            | 1437  | 1110     | C00042 | HMDB00254 |
| succinylcarnitine (C4-DC)                              | Energy                 | TCA Cycle                                            | 37058 | 71464481 | NA     | HMDB61717 |
| 1-(1-enyl-oleoyl)-GPE (P-18:1)*                        | Lipid                  | Lysoplasmalogen                                      | 44621 | NA       | NA     | NA        |
| 1-(1-enyl-palmitoyl)-2-arachidonoyl-GPC (P-16:0/20:4)* | Lipid                  | Plasmalogen                                          | 52689 | NA       | NA     | HMDB11220 |
| 1-(1-enyl-palmitoyl)-2-arachidonoyl-GPE (P-16:0/20:4)* | Lipid                  | Plasmalogen                                          | 52673 | NA       | NA     | HMDB11352 |

|                                                        |       |                               |       |          |        |           |
|--------------------------------------------------------|-------|-------------------------------|-------|----------|--------|-----------|
| 1-(1-enyl-palmitoyl)-2-linoleoyl-GPC (P-16:0/18:2)*    | Lipid | Plasmalogen                   | 52682 | NA       | NA     | HMDB11211 |
| 1-(1-enyl-palmitoyl)-2-linoleoyl-GPE (P-16:0/18:2)*    | Lipid | Plasmalogen                   | 52677 | NA       | NA     | HMDB11343 |
| 1-(1-enyl-palmitoyl)-2-oleoyl-GPC (P-16:0/18:1)*       | Lipid | Plasmalogen                   | 52478 | NA       | NA     | NA        |
| 1-(1-enyl-palmitoyl)-2-palmitoleoyl-GPC (P-16:0/16:1)* | Lipid | Plasmalogen                   | 52713 | NA       | NA     | HMDB11207 |
| 1-(1-enyl-palmitoyl)-2-palmitoyl-GPC (P-16:0/16:0)*    | Lipid | Plasmalogen                   | 52716 | 11146967 | NA     | HMDB11206 |
| 1-(1-enyl-palmitoyl)-GPC (P-16:0)*                     | Lipid | Lysoplasmalogen               | 52474 | 10917802 | NA     | HMDB10407 |
| 1-(1-enyl-palmitoyl)-GPE (P-16:0)*                     | Lipid | Lysoplasmalogen               | 39270 | NA       | NA     | NA        |
| 1-(1-enyl-stearoyl)-2-arachidonoyl-GPE (P-18:0/20:4)*  | Lipid | Plasmalogen                   | 52475 | 9547058  | NA     | HMDB05779 |
| 1-(1-enyl-stearoyl)-2-linoleoyl-GPE (P-18:0/18:2)*     | Lipid | Plasmalogen                   | 52748 | NA       | NA     | HMDB11376 |
| 1-(1-enyl-stearoyl)-2-oleoyl-GPE (P-18:0/18:1)         | Lipid | Plasmalogen                   | 52614 | NA       | NA     | HMDB11375 |
| 1-(1-enyl-stearoyl)-GPE (P-18:0)*                      | Lipid | Lysoplasmalogen               | 39271 | NA       | NA     | NA        |
| 1-arachidonoyl-GPC (20:4n6)*                           | Lipid | Lysophospholipid              | 33228 | NA       | C05208 | HMDB10395 |
| 1-arachidonoyl-GPE (20:4n6)*                           | Lipid | Lysophospholipid              | 35186 | 42607465 | NA     | HMDB11517 |
| 1-arachidonoyl-GPI (20:4)*                             | Lipid | Lysophospholipid              | 34214 | NA       | NA     | HMDB61690 |
| 1-arachidonylglycerol (20:4)                           | Lipid | Monoacylglycerol              | 34397 | 5282281  | C13857 | HMDB11549 |
| 1-dihomo-linolenylglycerol (20:3)                      | Lipid | Monoacylglycerol              | 48341 | NA       | NA     | NA        |
| 1-docosahexaenoylglycerol (22:6)                       | Lipid | Monoacylglycerol              | 35153 | NA       | NA     | HMDB11587 |
| 1-lignoceroyl-GPC (24:0)                               | Lipid | Lysophospholipid              | 49617 | NA       | NA     | HMDB10405 |
| 1-linolenoyl-GPC (18:3)*                               | Lipid | Lysophospholipid              | 45951 | NA       | NA     | HMDB10388 |
| 1-linolenoylglycerol (18:3)                            | Lipid | Monoacylglycerol              | 34393 | 53480978 | NA     | HMDB11569 |
| 1-linoleoyl-2-arachidonoyl-GPC (18:2/20:4n6)*          | Lipid | Phosphatidylcholine (PC)      | 52710 | NA       | NA     | HMDB08147 |
| 1-linoleoyl-2-linolenoyl-GPC (18:2/18:3)*              | Lipid | Phosphatidylcholine (PC)      | 53176 | NA       | NA     | HMDB08141 |
| 1-linoleoyl-GPC (18:2)                                 | Lipid | Lysophospholipid              | 34419 | 11988421 | C04100 | HMDB10386 |
| 1-linoleoyl-GPE (18:2)*                                | Lipid | Lysophospholipid              | 36600 | 52925130 | NA     | HMDB11507 |
| 1-linoleoyl-GPG (18:2)*                                | Lipid | Lysophospholipid              | 54885 | NA       | NA     | NA        |
| 1-linoleoyl-GPI (18:2)*                                | Lipid | Lysophospholipid              | 36594 | NA       | NA     | NA        |
| 1-linoleoylglycerol (18:2)                             | Lipid | Monoacylglycerol              | 27447 | 5283469  | NA     | NA        |
| 1-oleoyl-2-linoleoyl-GPE (18:1/18:2)*                  | Lipid | Phosphatidylethanolamine (PE) | 52687 | 9546753  | NA     | HMDB05349 |
| 1-oleoyl-GPC (18:1)                                    | Lipid | Lysophospholipid              | 48258 | 16081932 | NA     | HMDB02815 |
| 1-oleoyl-GPE (18:1)                                    | Lipid | Lysophospholipid              | 35628 | 9547071  | NA     | HMDB11506 |
| 1-oleoyl-GPI (18:1)*                                   | Lipid | Lysophospholipid              | 36602 | NA       | NA     | NA        |
| 1-oleoylglycerol (18:1)                                | Lipid | Monoacylglycerol              | 21184 | 5283468  | NA     | HMDB11567 |
| 1-palmitoleoyl-GPC (16:1)*                             | Lipid | Lysophospholipid              | 33230 | 24779461 | NA     | HMDB10383 |

|                                              |       |                               |       |          |        |           |
|----------------------------------------------|-------|-------------------------------|-------|----------|--------|-----------|
| 1-palmitoyl-2-arachidonoyl-GPC (16:0/20:4n6) | Lipid | Phosphatidylcholine (PC)      | 52462 | 10747814 | NA     | HMDB07982 |
| 1-palmitoyl-2-arachidonoyl-GPE (16:0/20:4)*  | Lipid | Phosphatidylethanolamine (PE) | 52464 | 9546800  | NA     | HMDB05323 |
| 1-palmitoyl-2-arachidonoyl-GPI (16:0/20:4)*  | Lipid | Phosphatidylinositol (PI)     | 52467 | NA       | NA     | HMDB09789 |
| 1-palmitoyl-2-linoleoyl-GPC (16:0/18:2)      | Lipid | Phosphatidylcholine (PC)      | 42446 | 5287971  | NA     | HMDB07973 |
| 1-palmitoyl-2-linoleoyl-GPE (16:0/18:2)      | Lipid | Phosphatidylethanolamine (PE) | 42449 | 9546747  | NA     | HMDB05322 |
| 1-palmitoyl-2-linoleoyl-GPI (16:0/18:2)      | Lipid | Phosphatidylinositol (PI)     | 52450 | NA       | NA     | HMDB09784 |
| 1-palmitoyl-2-oleoyl-GPC (16:0/18:1)         | Lipid | Phosphatidylcholine (PC)      | 52461 | 6436017  | NA     | HMDB07972 |
| 1-palmitoyl-2-oleoyl-GPE (16:0/18:1)         | Lipid | Phosphatidylethanolamine (PE) | 19263 | 5283496  | NA     | HMDB05320 |
| 1-palmitoyl-2-oleoyl-GPI (16:0/18:1)*        | Lipid | Phosphatidylinositol (PI)     | 52669 | NA       | NA     | HMDB09783 |
| 1-palmitoyl-2-palmitoleoyl-GPC (16:0/16:1)*  | Lipid | Phosphatidylcholine (PC)      | 52470 | NA       | NA     | HMDB07969 |
| 1-palmitoyl-2-stearoyl-GPC (16:0/18:0)       | Lipid | Phosphatidylcholine (PC)      | 52616 | NA       | NA     | HMDB07970 |
| 1-palmitoyl-GPC (16:0)                       | Lipid | Lysophospholipid              | 33955 | 86554    | NA     | HMDB10382 |
| 1-palmitoyl-GPE (16:0)                       | Lipid | Lysophospholipid              | 35631 | 9547069  | NA     | HMDB11503 |
| 1-palmitoyl-GPG (16:0)*                      | Lipid | Lysophospholipid              | 45970 | 3300276  | NA     | NA        |
| 1-palmitoyl-GPI (16:0)                       | Lipid | Lysophospholipid              | 35305 | NA       | NA     | HMDB61695 |
| 1-stearoyl-2-arachidonoyl-GPC (18:0/20:4)    | Lipid | Phosphatidylcholine (PC)      | 42450 | 16219824 | NA     | HMDB08048 |
| 1-stearoyl-2-arachidonoyl-GPE (18:0/20:4)    | Lipid | Phosphatidylethanolamine (PE) | 52447 | 5289133  | NA     | HMDB09003 |
| 1-stearoyl-2-arachidonoyl-GPI (18:0/20:4)    | Lipid | Phosphatidylinositol (PI)     | 52449 | NA       | NA     | HMDB09815 |
| 1-stearoyl-2-linoleoyl-GPC (18:0/18:2)*      | Lipid | Phosphatidylcholine (PC)      | 52452 | NA       | NA     | HMDB08039 |
| 1-stearoyl-2-linoleoyl-GPE (18:0/18:2)*      | Lipid | Phosphatidylethanolamine (PE) | 52446 | 9546749  | NA     | HMDB08994 |
| 1-stearoyl-2-linoleoyl-GPI (18:0/18:2)       | Lipid | Phosphatidylinositol (PI)     | 52468 | NA       | NA     | HMDB09809 |
| 1-stearoyl-2-oleoyl-GPC (18:0/18:1)          | Lipid | Phosphatidylcholine (PC)      | 52438 | NA       | NA     | HMDB08038 |
| 1-stearoyl-2-oleoyl-GPE (18:0/18:1)          | Lipid | Phosphatidylethanolamine (PE) | 42448 | NA       | NA     | HMDB08993 |
| 1-stearoyl-2-oleoyl-GPS (18:0/18:1)          | Lipid | Phosphatidylserine (PS)       | 19265 | 9547087  | NA     | HMDB10163 |
| 1-stearoyl-GPC (18:0)                        | Lipid | Lysophospholipid              | 33961 | 497299   | NA     | HMDB10384 |
| 1-stearoyl-GPE (18:0)                        | Lipid | Lysophospholipid              | 42398 | 9547068  | NA     | HMDB11130 |
| 1-stearoyl-GPI (18:0)                        | Lipid | Lysophospholipid              | 19324 | NA       | NA     | HMDB61696 |
| 1,2-dilinoleoyl-GPC (18:2/18:2)              | Lipid | Phosphatidylcholine (PC)      | 52603 | 5288075  | NA     | HMDB08138 |
| 1,2-dipalmitoyl-GPC (16:0/16:0)              | Lipid | Phosphatidylcholine (PC)      | 19130 | 452110   | NA     | HMDB00564 |
| 10-heptadecenoate (17:1n7)                   | Lipid | Long Chain Fatty Acid         | 33971 | 5312435  | NA     | HMDB60038 |
| 10-nonadecenoate (19:1n9)                    | Lipid | Long Chain Fatty Acid         | 33972 | 5312513  | NA     | HMDB13622 |
| 10-undecenoate (11:1n1)                      | Lipid | Medium Chain Fatty Acid       | 32497 | 14891    | C13910 | HMDB33724 |
| 12-HETE                                      | Lipid | Eicosanoid                    | 37536 | 5312983  | NA     | HMDB06111 |



|                                                      |       |                           |       |          |        |           |
|------------------------------------------------------|-------|---------------------------|-------|----------|--------|-----------|
| 14-HDoHE/17-HDoHE                                    | Lipid | Fatty Acid, Monohydroxy   | 53034 | NA       | NA     | NA        |
| 15-methylpalmitate (i17:0)                           | Lipid | Fatty Acid, Branched      | 38768 | 17903417 | NA     | NA        |
| 16-hydroxypalmitate                                  | Lipid | Fatty Acid, Monohydroxy   | 39609 | 10466    | C18218 | HMDB06294 |
| 16a-hydroxy DHEA 3-sulfate                           | Lipid | Androgenic Steroids       | 38168 | NA       | NA     | NA        |
| 17-methylstearate (i19:0)                            | Lipid | Fatty Acid, Branched      | 38296 | 3083779  | NA     | HMDB37397 |
| 2-aminoheptanoate                                    | Lipid | Fatty Acid, Amino         | 43761 | 227939   | NA     | NA        |
| 2-aminooctanoate                                     | Lipid | Fatty Acid, Amino         | 43343 | 69522    | NA     | HMDB00991 |
| 2-arachidonoylglycerol (20:4)                        | Lipid | Monoacylglycerol          | 19266 | 5282280  | C13856 | HMDB04666 |
| 2-hydroxydecanoate                                   | Lipid | Fatty Acid, Monohydroxy   | 42489 | 21488    | NA     | NA        |
| 2-hydroxyglutarate                                   | Lipid | Fatty Acid, Dicarboxylate | 37253 | 43       | C02630 | HMDB00606 |
| 2-hydroxyoctanoate                                   | Lipid | Fatty Acid, Monohydroxy   | 22036 | 94180    | NA     | HMDB02264 |
| 2-hydroxypalmitate                                   | Lipid | Fatty Acid, Monohydroxy   | 35675 | 92836    | NA     | HMDB31057 |
| 2-hydroxystearate                                    | Lipid | Fatty Acid, Monohydroxy   | 17945 | 69417    | C03045 | NA        |
| 2-linoleoylglycerol (18:2)                           | Lipid | Monoacylglycerol          | 32506 | 5365676  | NA     | HMDB11538 |
| 2-oleoylglycerol (18:1)                              | Lipid | Monoacylglycerol          | 21232 | 5319879  | NA     | HMDB11537 |
| 2-palmitoleoyl-GPC (16:1)*                           | Lipid | Lysophospholipid          | 47118 | NA       | NA     | HMDB10383 |
| 2-palmitoyl-GPC (16:0)*                              | Lipid | Lysophospholipid          | 35253 | 15061532 | NA     | HMDB61702 |
| 2-stearoyl-GPE (18:0)*                               | Lipid | Lysophospholipid          | 41220 | NA       | NA     | HMDB11129 |
| 21-hydroxypregnenolone disulfate                     | Lipid | Pregnenolone Steroids     | 46115 | 134595   | NA     | NA        |
| 3-carboxy-4-methyl-5-propyl-2-furanpropanoate (CMPF) | Lipid | Fatty Acid, Dicarboxylate | 31787 | 123979   | NA     | HMDB61112 |
| 3-hydroxy-3-methylglutarate                          | Lipid | Mevalonate Metabolism     | 531   | 1662     | C03761 | HMDB00355 |
| 3-hydroxybutyrate (BHBA)                             | Lipid | Ketone Bodies             | 542   | 441      | C01089 | HMDB00357 |
| 3-hydroxydecanoate                                   | Lipid | Fatty Acid, Monohydroxy   | 22053 | 26612    | NA     | HMDB02203 |
| 3-hydroxyhexanoate                                   | Lipid | Fatty Acid, Monohydroxy   | 53230 | 151492   | NA     | NA        |
| 3-hydroxylaurate                                     | Lipid | Fatty Acid, Monohydroxy   | 32457 | 94216    | NA     | HMDB00387 |
| 3-hydroxyoctanoate                                   | Lipid | Fatty Acid, Monohydroxy   | 22001 | 26613    | NA     | HMDB01954 |
| 3-hydroxysebacate                                    | Lipid | Fatty Acid, Monohydroxy   | 31943 | 3017884  | NA     | HMDB00350 |
| 3-methyladipate                                      | Lipid | Fatty Acid, Dicarboxylate | 36749 | 12292    | NA     | HMDB00555 |
| 3beta-hydroxy-5-cholestenoate                        | Lipid | Sterol                    | 54805 | 165511   | C17333 | NA        |
| 3beta,7alpha-dihydroxy-5-cholestenoate               | Lipid | Sterol                    | 36803 | 3081084  | C17335 | NA        |
| 4-cholesten-3-one                                    | Lipid | Sterol                    | 38125 | 91477    | C00599 | HMDB00921 |
| 5-dodecenoate (12:1n7)                               | Lipid | Medium Chain Fatty Acid   | 33968 | 5312378  | NA     | HMDB00529 |
| 5-hydroxyhexanoate                                   | Lipid | Fatty Acid, Monohydroxy   | 31938 | 170748   | NA     | HMDB00525 |

|                                                     |       |                                              |       |          |        |           |
|-----------------------------------------------------|-------|----------------------------------------------|-------|----------|--------|-----------|
| 5alpha-androstan-3alpha,17beta-diol monosulfate (1) | Lipid | Androgenic Steroids                          | 37186 | NA       | NA     | NA        |
| 5alpha-androstan-3beta,17alpha-diol disulfate       | Lipid | Androgenic Steroids                          | 37187 | NA       | NA     | NA        |
| 5alpha-androstan-3beta,17beta-diol disulfate        | Lipid | Androgenic Steroids                          | 37190 | 242332   | C12525 | HMDB00493 |
| 5alpha-androstan-3beta,17beta-diol monosulfate (2)  | Lipid | Androgenic Steroids                          | 37192 | NA       | NA     | NA        |
| 5alpha-pregnan-3beta,20alpha-diol disulfate         | Lipid | Progestin Steroids                           | 37198 | NA       | NA     | NA        |
| 5alpha-pregnan-3beta,20alpha-diol monosulfate (2)   | Lipid | Progestin Steroids                           | 37200 | NA       | NA     | NA        |
| 5alpha-pregnan-3beta,20beta-diol monosulfate (1)    | Lipid | Progestin Steroids                           | 37196 | NA       | NA     | NA        |
| 7-alpha-hydroxy-3-oxo-4-cholestenoate (7-Hoca)      | Lipid | Sterol                                       | 36776 | 3081085  | C17337 | HMDB12458 |
| 9-hydroxystearate                                   | Lipid | Fatty Acid, Monohydroxy                      | 47120 | 9570127  | NA     | HMDB61661 |
| acetylcarnitine (C2)                                | Lipid | Fatty Acid Metabolism(Acyl Carnitine)        | 32198 | 1        | C02571 | HMDB00201 |
| adrenate (22:4n6)                                   | Lipid | Polyunsaturated Fatty Acid (n3 and n6)       | 32980 | 5497181  | C16527 | HMDB02226 |
| andro steroid monosulfate C19H28O6S (1)*            | Lipid | Androgenic Steroids                          | 32827 | NA       | C04555 | HMDB02759 |
| androstenediol (3alpha, 17alpha) monosulfate (2)    | Lipid | Androgenic Steroids                          | 37207 | NA       | NA     | NA        |
| androstenediol (3alpha, 17alpha) monosulfate (3)    | Lipid | Androgenic Steroids                          | 37209 | NA       | NA     | NA        |
| androstenediol (3beta,17beta) disulfate (1)         | Lipid | Androgenic Steroids                          | 37202 | 87120982 | C04295 | HMDB03818 |
| androstenediol (3beta,17beta) disulfate (2)         | Lipid | Androgenic Steroids                          | 37203 | 87120982 | C04295 | HMDB03818 |
| androstenediol (3beta,17beta) monosulfate (1)       | Lipid | Androgenic Steroids                          | 37211 | 13847309 | NA     | HMDB03818 |
| androstenediol (3beta,17beta) monosulfate (2)       | Lipid | Androgenic Steroids                          | 37210 | NA       | NA     | NA        |
| androsterone sulfate                                | Lipid | Androgenic Steroids                          | 31591 | 159663   | NA     | HMDB02759 |
| arachidate (20:0)                                   | Lipid | Long Chain Fatty Acid                        | 1118  | 10467    | C06425 | HMDB02212 |
| arachidonate (20:4n6)                               | Lipid | Polyunsaturated Fatty Acid (n3 and n6)       | 1110  | 444899   | C00219 | HMDB01043 |
| arachidonoylcarnitine (C20:4)                       | Lipid | Fatty Acid Metabolism(Acyl Carnitine)        | 57518 | NA       | NA     | NA        |
| arachidonoylcholine                                 | Lipid | Fatty Acid Metabolism (Acyl Choline)         | 53261 | NA       | NA     | NA        |
| azelate (C9-DC)                                     | Lipid | Fatty Acid, Dicarboxylate                    | 18362 | 2266     | C08261 | HMDB00784 |
| behenoyl dihydrosphingomyelin (d18:0/22:0)*         | Lipid | Dihydrosphingomyelins                        | 57331 | NA       | NA     | HMDB12091 |
| behenoyl sphingomyelin (d18:1/22:0)*                | Lipid | Sphingomyelins                               | 48492 | NA       | NA     | HMDB12103 |
| behenoylcarnitine (C22)*                            | Lipid | Fatty Acid Metabolism(Acyl Carnitine)        | 57514 | NA       | NA     | NA        |
| beta-sitosterol                                     | Lipid | Sterol                                       | 27414 | 222284   | C01753 | HMDB00852 |
| butyrylcarnitine (C4)                               | Lipid | Fatty Acid Metabolism (also BCAA Metabolism) | 32412 | 439829   | C02862 | HMDB02013 |
| campesterol                                         | Lipid | Sterol                                       | 33997 | 173183   | C01789 | HMDB02869 |
| caprate (10:0)                                      | Lipid | Medium Chain Fatty Acid                      | 1642  | 2969     | C01571 | HMDB00511 |
| caproate (6:0)                                      | Lipid | Medium Chain Fatty Acid                      | 32489 | 8892     | C01585 | HMDB00535 |
| caprylate (8:0)                                     | Lipid | Medium Chain Fatty Acid                      | 32492 | 379      | C06423 | HMDB00482 |

|                                                |       |                                        |       |          |        |           |
|------------------------------------------------|-------|----------------------------------------|-------|----------|--------|-----------|
| carnitine                                      | Lipid | Carnitine Metabolism                   | 15500 | 10917    | C00318 | HMDB00062 |
| ceramide (d18:1/14:0, d16:1/16:0)*             | Lipid | Ceramides                              | 57432 | NA       | NA     | NA        |
| ceramide (d18:1/17:0, d17:1/18:0)*             | Lipid | Ceramides                              | 57434 | NA       | NA     | NA        |
| ceramide (d18:1/20:0, d16:1/22:0, d20:1/18:0)* | Lipid | Ceramides                              | 57440 | NA       | NA     | NA        |
| ceramide (d18:2/24:1, d18:1/24:2)*             | Lipid | Ceramides                              | 57443 | NA       | NA     | NA        |
| cerotylcarnitine (C26)*                        | Lipid | Fatty Acid Metabolism(Acyl Carnitine)  | 57516 | NA       | NA     | HMDB06347 |
| chenodeoxycholate                              | Lipid | Primary Bile Acid Metabolism           | 1563  | 10133    | C02528 | HMDB00518 |
| cholate                                        | Lipid | Primary Bile Acid Metabolism           | 22842 | 221493   | C00695 | HMDB00619 |
| cholesterol                                    | Lipid | Sterol                                 | 63    | 11025495 | C00187 | HMDB00067 |
| choline                                        | Lipid | Phospholipid Metabolism                | 15506 | 305      | C00114 | HMDB00097 |
| choline phosphate                              | Lipid | Phospholipid Metabolism                | 34396 | 1014     | C00588 | HMDB01565 |
| cis-4-decenoylcarnitine (C10:1)                | Lipid | Fatty Acid Metabolism(Acyl Carnitine)  | 38178 | NA       | NA     | NA        |
| cortisol                                       | Lipid | Corticosteroids                        | 1712  | 5754     | C00735 | HMDB00063 |
| cortisone                                      | Lipid | Corticosteroids                        | 1769  | 222786   | C00762 | HMDB02802 |
| decanoylcarnitine (C10)                        | Lipid | Fatty Acid Metabolism(Acyl Carnitine)  | 33941 | 10245190 | NA     | HMDB00651 |
| dehydroisoandrosterone sulfate (DHEA-S)        | Lipid | Androgenic Steroids                    | 32425 | 12594    | C04555 | HMDB01032 |
| deoxycarnitine                                 | Lipid | Carnitine Metabolism                   | 36747 | 134      | C01181 | HMDB01161 |
| deoxycholate                                   | Lipid | Secondary Bile Acid Metabolism         | 1114  | 222528   | C04483 | HMDB00626 |
| dihomo-linoleate (20:2n6)                      | Lipid | Polyunsaturated Fatty Acid (n3 and n6) | 17805 | 6439848  | C16525 | HMDB05060 |
| dihomo-linolenate (20:3n3 or n6)               | Lipid | Polyunsaturated Fatty Acid (n3 and n6) | 35718 | 5280581  | C03242 | HMDB02925 |
| dihomo-linolenoyl-choline                      | Lipid | Fatty Acid Metabolism (Acyl Choline)   | 53262 | NA       | NA     | NA        |
| dihomo-linolenoylcarnitine (C20:3n3 or 6)*     | Lipid | Fatty Acid Metabolism(Acyl Carnitine)  | 57521 | NA       | NA     | NA        |
| dihomo-linoleoylcarnitine (C20:2)*             | Lipid | Fatty Acid Metabolism(Acyl Carnitine)  | 57520 | NA       | NA     | NA        |
| docosadienoate (22:2n6)                        | Lipid | Polyunsaturated Fatty Acid (n3 and n6) | 32415 | 5282807  | C16533 | HMDB61714 |
| docosahexaenoate (DHA; 22:6n3)                 | Lipid | Polyunsaturated Fatty Acid (n3 and n6) | 44675 | 445580   | C06429 | HMDB02183 |
| docosahexaenoylcarnitine (C22:6)*              | Lipid | Fatty Acid Metabolism(Acyl Carnitine)  | 57523 | NA       | NA     | NA        |
| docosahexaenoylcholine                         | Lipid | Fatty Acid Metabolism (Acyl Choline)   | 53263 | NA       | NA     | NA        |
| docosapentaenoate (n3 DPA; 22:5n3)             | Lipid | Polyunsaturated Fatty Acid (n3 and n6) | 32504 | 6441454  | C16513 | HMDB06528 |
| docosapentaenoate (n6 DPA; 22:5n6)             | Lipid | Polyunsaturated Fatty Acid (n3 and n6) | 37478 | 6441454  | C16513 | HMDB01976 |
| docosapentaenoylcarnitine (C22:5n3)*           | Lipid | Fatty Acid Metabolism(Acyl Carnitine)  | 57529 | NA       | NA     | NA        |
| dodecanedioate (C12-DC)                        | Lipid | Fatty Acid, Dicarboxylate              | 32388 | 12736    | C02678 | HMDB00623 |
| eicosanodioate (C20-DC)                        | Lipid | Fatty Acid, Dicarboxylate              | 39831 | 75502    | NA     | NA        |
| eicosapentaenoate (EPA; 20:5n3)                | Lipid | Polyunsaturated Fatty Acid (n3 and n6) | 18467 | 446284   | C06428 | HMDB01999 |

|                                                  |       |                                        |       |          |        |           |
|--------------------------------------------------|-------|----------------------------------------|-------|----------|--------|-----------|
| eicosapentaenoylcholine                          | Lipid | Fatty Acid Metabolism (Acyl Choline)   | 53258 | NA       | NA     | NA        |
| eicosenoate (20:1)                               | Lipid | Long Chain Fatty Acid                  | 33587 | 5282768  | C16526 | HMDB02231 |
| eicosenoylcarnitine (C20:1)*                     | Lipid | Fatty Acid Metabolism(Acyl Carnitine)  | 57519 | NA       | NA     | NA        |
| epiandrosterone sulfate                          | Lipid | Androgenic Steroids                    | 33973 | 9929317  | NA     | NA        |
| erucate (22:1n9)                                 | Lipid | Long Chain Fatty Acid                  | 1552  | 5281116  | C08316 | HMDB02068 |
| etiocholanolone glucuronide                      | Lipid | Androgenic Steroids                    | 47112 | 270605   | NA     | HMDB04484 |
| glutarate (C5-DC)                                | Lipid | Fatty Acid, Dicarboxylate              | 396   | 743      | C00489 | HMDB00661 |
| glycerol                                         | Lipid | Glycerolipid Metabolism                | 15122 | 753      | C00116 | HMDB00131 |
| glycerol 3-phosphate                             | Lipid | Glycerolipid Metabolism                | 43847 | 754      | C00093 | HMDB00126 |
| glycerophosphoethanolamine                       | Lipid | Phospholipid Metabolism                | 37455 | 123874   | C01233 | HMDB00114 |
| glycerophosphoinositol*                          | Lipid | Phospholipid Metabolism                | 47155 | 167572   | NA     | NA        |
| glycerophosphorylcholine (GPC)                   | Lipid | Phospholipid Metabolism                | 15990 | 71920    | C00670 | HMDB00086 |
| glycochenodeoxycholate                           | Lipid | Primary Bile Acid Metabolism           | 32346 | 12544    | C05466 | HMDB00637 |
| glycochenodeoxycholate glucuronide (1)           | Lipid | Primary Bile Acid Metabolism           | 52983 | NA       | NA     | NA        |
| glycochenodeoxycholate sulfate                   | Lipid | Primary Bile Acid Metabolism           | 52974 | NA       | NA     | NA        |
| glycocholate                                     | Lipid | Primary Bile Acid Metabolism           | 18476 | 10140    | C01921 | HMDB00138 |
| glycocholate sulfate*                            | Lipid | Secondary Bile Acid Metabolism         | 32599 | NA       | NA     | NA        |
| glycodeoxycholate                                | Lipid | Secondary Bile Acid Metabolism         | 18477 | 3035026  | C05464 | HMDB00631 |
| glycodeoxycholate sulfate                        | Lipid | Secondary Bile Acid Metabolism         | 52975 | NA       | NA     | NA        |
| glycolithocholate sulfate*                       | Lipid | Secondary Bile Acid Metabolism         | 32620 | 72222    | C11301 | HMDB02639 |
| glycosyl ceramide (d18:1/20:0, d16:1/22:0)*      | Lipid | Hexosylceramides (HCER)                | 57595 | NA       | NA     | NA        |
| glycosyl ceramide (d18:2/24:1, d18:1/24:2)*      | Lipid | Hexosylceramides (HCER)                | 57453 | NA       | NA     | NA        |
| glycosyl-N-behenoyl-sphingadienine (d18:2/22:0)* | Lipid | Hexosylceramides (HCER)                | 57421 | NA       | NA     | NA        |
| glycosyl-N-nervonoyl-sphingosine (d18:1/24:1)*   | Lipid | Hexosylceramides (HCER)                | 57369 | NA       | NA     | NA        |
| glycosyl-N-palmitoyl-sphingosine (d18:1/16:0)    | Lipid | Hexosylceramides (HCER)                | 53013 | NA       | NA     | NA        |
| glycosyl-N-stearoyl-sphingosine (d18:1/18:0)     | Lipid | Hexosylceramides (HCER)                | 52234 | NA       | NA     | NA        |
| glycoursodeoxycholate                            | Lipid | Secondary Bile Acid Metabolism         | 39379 | 12310288 | NA     | HMDB00708 |
| hexadecanedioate (C16-DC)                        | Lipid | Fatty Acid, Dicarboxylate              | 35678 | 10459    | C19615 | HMDB00672 |
| hexanoylcarnitine (C6)                           | Lipid | Fatty Acid Metabolism(Acyl Carnitine)  | 32328 | 6426853  | NA     | HMDB00705 |
| hexanoylglutamine                                | Lipid | Fatty Acid Metabolism (Acyl Glutamine) | 54907 | NA       | NA     | NA        |
| hexanoylglycine                                  | Lipid | Fatty Acid Metabolism(Acyl Glycine)    | 35436 | 99463    | NA     | HMDB00701 |
| isoursodeoxycholate                              | Lipid | Secondary Bile Acid Metabolism         | 57577 | 127601   | C17662 | HMDB00686 |
| lactosyl-N-nervonoyl-sphingosine (d18:1/24:1)*   | Lipid | Lactosylceramides (LCER)               | 57370 | NA       | NA     | NA        |

|                                                     |       |                                        |       |          |        |           |
|-----------------------------------------------------|-------|----------------------------------------|-------|----------|--------|-----------|
| lactosyl-N-palmitoyl-sphingosine (d18:1/16:0)       | Lipid | Lactosylceramides (LCER)               | 53010 | NA       | NA     | NA        |
| laurate (12:0)                                      | Lipid | Medium Chain Fatty Acid                | 1645  | 3893     | C02679 | HMDB00638 |
| laurylcarnitine (C12)                               | Lipid | Fatty Acid Metabolism(Acyl Carnitine)  | 34534 | 10427569 | NA     | HMDB02250 |
| lignoceroyl sphingomyelin (d18:1/24:0)              | Lipid | Sphingomyelins                         | 57330 | NA       | NA     | NA        |
| lignoceroylcarnitine (C24)*                         | Lipid | Fatty Acid Metabolism(Acyl Carnitine)  | 57515 | NA       | NA     | NA        |
| linoleate (18:2n6)                                  | Lipid | Polyunsaturated Fatty Acid (n3 and n6) | 1105  | 5280450  | C01595 | HMDB00673 |
| linolenate [alpha or gamma; (18:3n3 or 6)]          | Lipid | Polyunsaturated Fatty Acid (n3 and n6) | 34035 | 5280934  | C06426 | HMDB03073 |
| linolenoylcarnitine (C18:3)*                        | Lipid | Fatty Acid Metabolism(Acyl Carnitine)  | 57511 | NA       | NA     | NA        |
| linoleoyl ethanolamide                              | Lipid | Endocannabinoid                        | 52608 | 5283446  | NA     | HMDB12252 |
| linoleoyl-arachidonoyl-glycerol (18:2/20:4) [1]*    | Lipid | Diacylglycerol                         | 54955 | NA       | NA     | HMDB07257 |
| linoleoyl-arachidonoyl-glycerol (18:2/20:4) [2]*    | Lipid | Diacylglycerol                         | 54956 | NA       | NA     | HMDB07257 |
| linoleoyl-docosahexaenoyl-glycerol (18:2/22:6) [2]* | Lipid | Diacylglycerol                         | 54950 | NA       | NA     | HMDB07266 |
| linoleoyl-linoleoyl-glycerol (18:2/18:2) [1]*       | Lipid | Diacylglycerol                         | 54968 | NA       | NA     | HMDB07248 |
| linoleoylcarnitine (C18:2)*                         | Lipid | Fatty Acid Metabolism(Acyl Carnitine)  | 46223 | 6450015  | NA     | HMDB06469 |
| linoleoylcholine*                                   | Lipid | Fatty Acid Metabolism (Acyl Choline)   | 57463 | NA       | NA     | NA        |
| maleate                                             | Lipid | Fatty Acid, Dicarboxylate              | 20676 | 444266   | C01384 | HMDB00176 |
| margarate (17:0)                                    | Lipid | Long Chain Fatty Acid                  | 1121  | 10465    | NA     | HMDB02259 |
| margaroylcarnitine (C17)*                           | Lipid | Fatty Acid Metabolism(Acyl Carnitine)  | 57512 | NA       | NA     | HMDB06210 |
| myo-inositol                                        | Lipid | Inositol Metabolism                    | 1124  | 892      | C00137 | HMDB00211 |
| myristate (14:0)                                    | Lipid | Long Chain Fatty Acid                  | 1365  | 11005    | C06424 | HMDB00806 |
| myristoleate (14:1n5)                               | Lipid | Long Chain Fatty Acid                  | 32418 | 5281119  | C08322 | HMDB02000 |
| myristoleoylcarnitine (C14:1)*                      | Lipid | Fatty Acid Metabolism(Acyl Carnitine)  | 48182 | 90659872 | NA     | NA        |
| myristoyl dihydrosphingomyelin (d18:0/14:0)*        | Lipid | Dihydrosphingomyelins                  | 57365 | NA       | NA     | HMDB12085 |
| myristoylcarnitine (C14)                            | Lipid | Fatty Acid Metabolism(Acyl Carnitine)  | 33952 | 6426854  | NA     | HMDB05066 |
| N-behenoyl-sphingadienine (d18:2/22:0)*             | Lipid | Ceramides                              | 57372 | NA       | NA     | NA        |
| N-palmitoyl-sphinganine (d18:0/16:0)                | Lipid | Dihydroceramides                       | 52604 | 5283572  | NA     | HMDB11760 |
| N-palmitoyl-sphingosine (d18:1/16:0)                | Lipid | Ceramides                              | 44877 | 5283564  | NA     | HMDB04949 |
| N-palmitoylglycine                                  | Lipid | Fatty Acid Metabolism(Acyl Glycine)    | 42092 | 151008   | NA     | HMDB13034 |
| N-stearoyl-sphingosine (d18:1/18:0)*                | Lipid | Ceramides                              | 54979 | 5283565  | NA     | HMDB04950 |
| nervonoylcarnitine (C24:1)*                         | Lipid | Fatty Acid Metabolism(Acyl Carnitine)  | 57531 | NA       | NA     | NA        |
| nonadecanoate (19:0)                                | Lipid | Long Chain Fatty Acid                  | 1356  | 12591    | C16535 | HMDB00772 |
| octadecanedioate (C18-DC)                           | Lipid | Fatty Acid, Dicarboxylate              | 36754 | 70095    | NA     | HMDB00782 |
| octanoylcarnitine (C8)                              | Lipid | Fatty Acid Metabolism(Acyl Carnitine)  | 33936 | 123701   | C02838 | HMDB00791 |

|                                                     |       |                                              |       |          |        |           |
|-----------------------------------------------------|-------|----------------------------------------------|-------|----------|--------|-----------|
| oleate/vaccenate (18:1)                             | Lipid | Long Chain Fatty Acid                        | 52285 | NA       | NA     | NA        |
| oleoyl-arachidonoyl-glycerol (18:1/20:4) [1]*       | Lipid | Diacylglycerol                               | 54960 | NA       | NA     | HMDB07228 |
| oleoyl-arachidonoyl-glycerol (18:1/20:4) [2]*       | Lipid | Diacylglycerol                               | 54961 | NA       | NA     | HMDB07228 |
| oleoyl-linoleoyl-glycerol (18:1/18:2) [1]           | Lipid | Diacylglycerol                               | 46798 | NA       | NA     | HMDB07219 |
| oleoyl-linoleoyl-glycerol (18:1/18:2) [2]           | Lipid | Diacylglycerol                               | 46799 | NA       | NA     | HMDB07219 |
| oleoyl-oleoyl-glycerol (18:1/18:1) [1]*             | Lipid | Diacylglycerol                               | 54945 | NA       | NA     | HMDB07218 |
| oleoyl-oleoyl-glycerol (18:1/18:1) [2]*             | Lipid | Diacylglycerol                               | 54946 | NA       | NA     | HMDB07218 |
| oleoylcarnitine (C18:1)                             | Lipid | Fatty Acid Metabolism(Acyl Carnitine)        | 35160 | 6441392  | NA     | HMDB05065 |
| oleoylcholine                                       | Lipid | Fatty Acid Metabolism (Acyl Choline)         | 53260 | NA       | NA     | NA        |
| palmitate (16:0)                                    | Lipid | Long Chain Fatty Acid                        | 1336  | 985      | C00249 | HMDB00220 |
| palmitoleate (16:1n7)                               | Lipid | Long Chain Fatty Acid                        | 33447 | 445638   | C08362 | HMDB03229 |
| palmitoleoyl-linoleoyl-glycerol (16:1/18:2) [1]*    | Lipid | Diacylglycerol                               | 54967 | NA       | NA     | HMDB07132 |
| palmitoleoylcarnitine (C16:1)*                      | Lipid | Fatty Acid Metabolism(Acyl Carnitine)        | 53223 | 71464547 | NA     | NA        |
| palmitoleoylcholine                                 | Lipid | Fatty Acid Metabolism (Acyl Choline)         | 53257 | NA       | NA     | NA        |
| palmitoyl dihydrosphingomyelin (d18:0/16:0)*        | Lipid | Dihydrosphingomyelins                        | 52434 | 9939965  | NA     | NA        |
| palmitoyl sphingomyelin (d18:1/16:0)                | Lipid | Sphingomyelins                               | 37506 | 9939941  | NA     | NA        |
| palmitoyl-arachidonoyl-glycerol (16:0/20:4) [2]*    | Lipid | Diacylglycerol                               | 54958 | NA       | NA     | HMDB07112 |
| palmitoyl-linoleoyl-glycerol (16:0/18:2) [1]*       | Lipid | Diacylglycerol                               | 52633 | 9543695  | NA     | HMDB07103 |
| palmitoyl-linoleoyl-glycerol (16:0/18:2) [2]*       | Lipid | Diacylglycerol                               | 52634 | NA       | NA     | HMDB07103 |
| palmitoyl-oleoyl-glycerol (16:0/18:1) [2]*          | Lipid | Diacylglycerol                               | 54942 | NA       | C13861 | HMDB07102 |
| palmitoylcarnitine (C16)                            | Lipid | Fatty Acid Metabolism(Acyl Carnitine)        | 44681 | 461      | C02990 | HMDB00222 |
| palmitoylcholine                                    | Lipid | Fatty Acid Metabolism (Acyl Choline)         | 52944 | 151731   | NA     | NA        |
| pentadecanoate (15:0)                               | Lipid | Long Chain Fatty Acid                        | 1361  | 13849    | C16537 | HMDB00826 |
| phosphoethanolamine                                 | Lipid | Phospholipid Metabolism                      | 1600  | 1015     | C00346 | HMDB00224 |
| pregnenediol-3-glucuronide                          | Lipid | Progesterin Steroids                         | 40708 | 123796   | NA     | HMDB10318 |
| pregnenediol disulfate (C21H34O8S2)*                | Lipid | Pregnenolone Steroids                        | 32562 | NA       | NA     | NA        |
| pregnenediol sulfate (C21H34O5S)*                   | Lipid | Pregnenolone Steroids                        | 32619 | NA       | NA     | NA        |
| pregnenolone sulfate                                | Lipid | Pregnenolone Steroids                        | 38170 | 105074   | NA     | HMDB00774 |
| propionylcarnitine (C3)                             | Lipid | Fatty Acid Metabolism (also BCAA Metabolism) | 32452 | 107738   | C03017 | HMDB00824 |
| propionylglycine                                    | Lipid | Fatty Acid Metabolism (also BCAA Metabolism) | 31932 | 98681    | NA     | HMDB00783 |
| sebacate (C10-DC)                                   | Lipid | Fatty Acid, Dicarboxylate                    | 32398 | 5192     | C08277 | HMDB00792 |
| sphinganine                                         | Lipid | Sphingolipid Synthesis                       | 17769 | 3126     | C00836 | HMDB00269 |
| sphingomyelin (d17:1/16:0, d18:1/15:0, d16:1/17:0)* | Lipid | Sphingomyelins                               | 52433 | NA       | NA     | NA        |

|                                                                 |       |                                        |       |          |        |           |
|-----------------------------------------------------------------|-------|----------------------------------------|-------|----------|--------|-----------|
| sphingomyelin (d17:2/16:0, d18:2/15:0)*                         | Lipid | Sphingomyelins                         | 57483 | NA       | NA     | NA        |
| sphingomyelin (d18:0/18:0, d19:0/17:0)*                         | Lipid | Dihydrosphingomyelins                  | 57473 | NA       | NA     | HMDB12087 |
| sphingomyelin (d18:0/20:0, d16:0/22:0)*                         | Lipid | Dihydrosphingomyelins                  | 57476 | NA       | NA     | NA        |
| sphingomyelin (d18:1/14:0, d16:1/16:0)*                         | Lipid | Sphingomyelins                         | 42463 | 11433862 | NA     | HMDB12097 |
| sphingomyelin (d18:1/17:0, d17:1/18:0, d19:1/16:0)              | Lipid | Sphingomyelins                         | 52615 | NA       | NA     | NA        |
| sphingomyelin (d18:1/18:1, d18:2/18:0)                          | Lipid | Sphingomyelins                         | 37529 | 6443882  | NA     | HMDB12101 |
| sphingomyelin (d18:1/19:0, d19:1/18:0)*                         | Lipid | Sphingomyelins                         | 57475 | NA       | NA     | NA        |
| sphingomyelin (d18:1/20:0, d16:1/22:0)*                         | Lipid | Sphingomyelins                         | 48490 | NA       | NA     | HMDB12102 |
| sphingomyelin (d18:1/20:1, d18:2/20:0)*                         | Lipid | Sphingomyelins                         | 48491 | NA       | NA     | NA        |
| sphingomyelin (d18:1/20:2, d18:2/20:1, d16:1/22:2)*             | Lipid | Sphingomyelins                         | 57481 | NA       | NA     | NA        |
| sphingomyelin (d18:1/21:0, d17:1/22:0, d16:1/23:0)*             | Lipid | Sphingomyelins                         | 52495 | NA       | NA     | NA        |
| sphingomyelin (d18:1/22:1, d18:2/22:0, d16:1/24:1)*             | Lipid | Sphingomyelins                         | 48493 | NA       | NA     | HMDB12104 |
| sphingomyelin (d18:1/22:2, d18:2/22:1, d16:1/24:2)*             | Lipid | Sphingomyelins                         | 57477 | NA       | NA     | NA        |
| sphingomyelin (d18:1/24:1, d18:2/24:0)*                         | Lipid | Sphingomyelins                         | 47153 | NA       | NA     | HMDB12107 |
| sphingomyelin (d18:1/25:0, d19:0/24:1, d20:1/23:0, d19:1/24:0)* | Lipid | Sphingomyelins                         | 57478 | NA       | NA     | NA        |
| sphingomyelin (d18:2/14:0, d18:1/14:1)*                         | Lipid | Sphingomyelins                         | 47154 | NA       | NA     | NA        |
| sphingomyelin (d18:2/16:0, d18:1/16:1)*                         | Lipid | Sphingomyelins                         | 42459 | NA       | NA     | NA        |
| sphingomyelin (d18:2/18:1)*                                     | Lipid | Sphingomyelins                         | 57474 | NA       | NA     | NA        |
| sphingomyelin (d18:2/21:0, d16:2/23:0)*                         | Lipid | Sphingomyelins                         | 57480 | NA       | NA     | NA        |
| sphingomyelin (d18:2/23:0, d18:1/23:1, d17:1/24:1)*             | Lipid | Sphingomyelins                         | 52435 | NA       | NA     | NA        |
| sphingomyelin (d18:2/23:1)*                                     | Lipid | Sphingomyelins                         | 57482 | NA       | NA     | NA        |
| sphingomyelin (d18:2/24:1, d18:1/24:2)*                         | Lipid | Sphingomyelins                         | 52437 | NA       | NA     | NA        |
| sphingomyelin (d18:2/24:2)*                                     | Lipid | Sphingomyelins                         | 57479 | NA       | NA     | NA        |
| sphingosine                                                     | Lipid | Sphingosines                           | 17747 | 5353955  | C00319 | HMDB00252 |
| sphingosine 1-phosphate                                         | Lipid | Sphingosines                           | 34445 | 5283560  | C06124 | HMDB00277 |
| stearate (18:0)                                                 | Lipid | Long Chain Fatty Acid                  | 1358  | 5281     | C01530 | HMDB00827 |
| stearidonate (18:4n3)                                           | Lipid | Polyunsaturated Fatty Acid (n3 and n6) | 33969 | 5312508  | C16300 | HMDB06547 |
| stearoyl sphingomyelin (d18:1/18:0)                             | Lipid | Sphingomyelins                         | 19503 | 6453725  | C00550 | HMDB01348 |
| stearoyl-arachidonoyl-glycerol (18:0/20:4) [1]*                 | Lipid | Diacylglycerol                         | 57450 | NA       | NA     | NA        |
| stearoyl-arachidonoyl-glycerol (18:0/20:4) [2]*                 | Lipid | Diacylglycerol                         | 57449 | NA       | NA     | NA        |
| stearoylcarnitine (C18)                                         | Lipid | Fatty Acid Metabolism(Acyl Carnitine)  | 34409 | 6426855  | NA     | HMDB00848 |
| stearoylcholine*                                                | Lipid | Fatty Acid Metabolism (Acyl Choline)   | 57464 | NA       | NA     | NA        |
| taurochenodeoxycholate                                          | Lipid | Primary Bile Acid Metabolism           | 18494 | 387316   | C05465 | HMDB00951 |

|                                         |            |                                                      |       |         |        |           |
|-----------------------------------------|------------|------------------------------------------------------|-------|---------|--------|-----------|
| taurocholate sulfate                    | Lipid      | Secondary Bile Acid Metabolism                       | 32807 | NA      | NA     | NA        |
| taurodeoxycholate                       | Lipid      | Secondary Bile Acid Metabolism                       | 12261 | 2733768 | C05463 | HMDB00896 |
| tauroolithocholate 3-sulfate            | Lipid      | Secondary Bile Acid Metabolism                       | 36850 | 440071  | C03642 | HMDB02580 |
| tetradecanedioate (C14-DC)              | Lipid      | Fatty Acid, Dicarboxylate                            | 35669 | 13185   | NA     | HMDB00872 |
| tricosanoyl sphingomyelin (d18:1/23:0)* | Lipid      | Sphingomyelins                                       | 52436 | NA      | NA     | HMDB12105 |
| trimethylamine N-oxide                  | Lipid      | Phospholipid Metabolism                              | 40406 | 1145    | C01104 | HMDB00925 |
| ursodeoxycholate                        | Lipid      | Secondary Bile Acid Metabolism                       | 1605  | 31401   | C07880 | HMDB00946 |
| ximenoylcarnitine (C26:1)*              | Lipid      | Fatty Acid Metabolism(Acyl Carnitine)                | 57517 | NA      | NA     | NA        |
| 2'-deoxyuridine                         | Nucleotide | Pyrimidine Metabolism, Uracil containing             | 1412  | 13712   | C00526 | HMDB00012 |
| 2'-O-methylcytidine                     | Nucleotide | Pyrimidine Metabolism, Cytidine containing           | 57554 | 150971  | NA     | NA        |
| 3-ureidopropionate                      | Nucleotide | Pyrimidine Metabolism, Uracil containing             | 3155  | 111     | C02642 | HMDB00026 |
| 5-methyluridine (ribothymidine)         | Nucleotide | Pyrimidine Metabolism, Uracil containing             | 35136 | 445408  | NA     | HMDB00884 |
| 5,6-dihydrothymine                      | Nucleotide | Pyrimidine Metabolism, Thymine containing            | 1418  | 93556   | C00906 | HMDB00079 |
| 7-methylguanine                         | Nucleotide | Purine Metabolism, Guanine containing                | 35114 | 11361   | C02242 | HMDB00897 |
| adenine                                 | Nucleotide | Purine Metabolism, Adenine containing                | 554   | 190     | C00147 | HMDB00034 |
| adenosine                               | Nucleotide | Purine Metabolism, Adenine containing                | 555   | 60961   | C00212 | HMDB00050 |
| allantoin                               | Nucleotide | Purine Metabolism, (Hypo)Xanthine/Inosine containing | 1107  | 204     | C02350 | HMDB00462 |
| beta-alanine                            | Nucleotide | Pyrimidine Metabolism, Uracil containing             | 55    | 239     | C00099 | HMDB00056 |
| cytidine                                | Nucleotide | Pyrimidine Metabolism, Cytidine containing           | 514   | 6175    | C00475 | HMDB00089 |
| dihydroorotate                          | Nucleotide | Pyrimidine Metabolism, Orotate containing            | 601   | 648     | C00337 | HMDB03349 |
| guanine                                 | Nucleotide | Purine Metabolism, Guanine containing                | 32352 | 764     | C00242 | HMDB00132 |
| hypoxanthine                            | Nucleotide | Purine Metabolism, (Hypo)Xanthine/Inosine containing | 3127  | 790     | C00262 | HMDB00157 |
| inosine                                 | Nucleotide | Purine Metabolism, (Hypo)Xanthine/Inosine containing | 1123  | 6021    | C00294 | HMDB00195 |
| N-acetyl-beta-alanine                   | Nucleotide | Pyrimidine Metabolism, Uracil containing             | 37432 | 76406   | C01073 | NA        |
| N1-methyladenosine                      | Nucleotide | Purine Metabolism, Adenine containing                | 15650 | 27476   | C02494 | HMDB03331 |
| N1-methylinosine                        | Nucleotide | Purine Metabolism, (Hypo)Xanthine/Inosine containing | 48351 | 65095   | NA     | HMDB02721 |
| N2,N2-dimethylguanosine                 | Nucleotide | Purine Metabolism, Guanine containing                | 35137 | 92919   | NA     | HMDB04824 |
| N6-carbamoylthreonyladenosine           | Nucleotide | Purine Metabolism, Adenine containing                | 35157 | 161466  | NA     | HMDB41623 |
| N6-succinyladenosine                    | Nucleotide | Purine Metabolism, Adenine containing                | 48130 | 165243  | NA     | HMDB00912 |
| orotate                                 | Nucleotide | Pyrimidine Metabolism, Orotate containing            | 1505  | 967     | C00295 | HMDB00226 |
| orotidine                               | Nucleotide | Pyrimidine Metabolism, Orotate containing            | 35172 | 92751   | NA     | HMDB00788 |
| pseudouridine                           | Nucleotide | Pyrimidine Metabolism, Uracil containing             | 33442 | 15047   | C02067 | HMDB00767 |
| uracil                                  | Nucleotide | Pyrimidine Metabolism, Uracil containing             | 605   | 1174    | C00106 | HMDB00300 |



|                                |            |                                                      |       |          |        |           |
|--------------------------------|------------|------------------------------------------------------|-------|----------|--------|-----------|
| urate                          | Nucleotide | Purine Metabolism, (Hypo)Xanthine/Inosine containing | 1604  | 1175     | C00366 | HMDB00289 |
| uridine                        | Nucleotide | Pyrimidine Metabolism, Uracil containing             | 606   | 6029     | C00299 | HMDB00296 |
| xanthine                       | Nucleotide | Purine Metabolism, (Hypo)Xanthine/Inosine containing | 3147  | 1188     | C00385 | HMDB00292 |
| 4-hydroxyphenylacetylglutamine | Peptide    | Acetylated Peptides                                  | 55017 | NA       | NA     | NA        |
| gamma-glutamylalanine          | Peptide    | Gamma-glutamyl Amino Acid                            | 37063 | 440103   | NA     | HMDB29142 |
| gamma-glutamylglutamine        | Peptide    | Gamma-glutamyl Amino Acid                            | 2730  | 150914   | C05283 | HMDB11738 |
| gamma-glutamylglycine          | Peptide    | Gamma-glutamyl Amino Acid                            | 33949 | 165527   | NA     | HMDB11667 |
| gamma-glutamylhistidine        | Peptide    | Gamma-glutamyl Amino Acid                            | 18245 | 7017195  | NA     | NA        |
| gamma-glutamylisoleucine*      | Peptide    | Gamma-glutamyl Amino Acid                            | 34456 | 14253342 | NA     | HMDB11170 |
| gamma-glutamylleucine          | Peptide    | Gamma-glutamyl Amino Acid                            | 18369 | 151023   | NA     | HMDB11171 |
| gamma-glutamylmethionine       | Peptide    | Gamma-glutamyl Amino Acid                            | 44872 | 7009567  | NA     | HMDB29155 |
| gamma-glutamylphenylalanine    | Peptide    | Gamma-glutamyl Amino Acid                            | 33422 | 111299   | NA     | HMDB00594 |
| gamma-glutamylthreonine        | Peptide    | Gamma-glutamyl Amino Acid                            | 33364 | 76078708 | NA     | HMDB29159 |
| gamma-glutamyltryptophan       | Peptide    | Gamma-glutamyl Amino Acid                            | 33947 | 3989307  | NA     | HMDB29160 |
| gamma-glutamyltyrosine         | Peptide    | Gamma-glutamyl Amino Acid                            | 2734  | 94340    | NA     | HMDB11741 |
| gamma-glutamylvaline           | Peptide    | Gamma-glutamyl Amino Acid                            | 43829 | 7015683  | NA     | HMDB11172 |
| isoleucylglycine               | Peptide    | Dipeptide                                            | 40008 | 342532   | NA     | HMDB28907 |
| phenylacetylglutamine          | Peptide    | Acetylated Peptides                                  | 35126 | 92258    | C04148 | HMDB06344 |

Legend: ID – identifier, NA – not available, PubChem – identifier on the library of the National Center for Biotechnology Information (<https://pubchem.ncbi.nlm.nih.gov/>), KEGG – identifier on the Kyoto Encyclopedia of Genes and Genomes (<https://www.genome.jp/kegg/compound/>), HMDB – identifier based on the human metabolome database (<https://hmdb.ca/>)
