# Supplementary material
Source: PubMed Central journal article supplement (PMC9560300)
Supplement: mmc7.pdf [file mmc7.pdf]

**Supplementary Table 6. met-QTL for the Coimbra, Portugal, cohort based on False Discovery Rate (q-vale < 0.05) – AMD patients only**

| Gene         | rsID        | CHRPOS<br>(major/ minor)    | Effect<br>Allele | MAF         | Super<br>Pathway | Sub Pathway                                  | Metabolite                  | Beta PT     | Pval PT   | Qval PT     |
|--------------|-------------|-----------------------------|------------------|-------------|------------------|----------------------------------------------|-----------------------------|-------------|-----------|-------------|
| <i>ASPM</i>  | rs199801555 | 1:197116704:GA:G            | G                | 0.059290795 | Amino Acid       | Leucine; Isoleucine and Valine<br>Metabolism | 2-hydroxy-3-methylvalerate  | 0.118176584 | 4.19x10-6 | 0.473502732 |
| <i>ASPM</i>  | rs61819094  | 1:197119778:C:G             | G                | 0.059307531 | Amino Acid       | Leucine; Isoleucine and Valine<br>Metabolism | 2-hydroxy-3-methylvalerate  | 0.118176584 | 4.19x10-6 | 0.473502732 |
| <i>ASPM</i>  | rs201247969 | 1:196958216:G:GTT           | GTT              | 0.056182008 | Amino Acid       | Leucine; Isoleucine and Valine<br>Metabolism | 2-hydroxy-3-methylvalerate  | 0.115374428 | 1.32x10-5 | 0.473502732 |
| <i>ARMS2</i> | rs12098648  | 10:124197243:A:G            | G                | 0.126267782 | Amino Acid       | Histidine Metabolism                         | 1-methyl-4-imidazoleacetate | 0.037418903 | 1.97x10-5 | 0.473502732 |
| <i>ARMS2</i> | rs111348404 | 10:124197641:G:A            | A                | 0.12642887  | Amino Acid       | Histidine Metabolism                         | 1-methyl-4-imidazoleacetate | 0.037418903 | 1.97x10-5 | 0.473502732 |
| <i>ARMS2</i> | rs76935275  | 10:124166835:T:G            | G                | 0.127018828 | Amino Acid       | Histidine Metabolism                         | 1-methyl-4-imidazoleacetate | 0.036963248 | 2.19x10-5 | 0.473502732 |
| <i>ARMS2</i> | rs2421027   | 10:124203648:A:G            | G                | 0.132361925 | Amino Acid       | Histidine Metabolism                         | 1-methyl-4-imidazoleacetate | 0.036484877 | 2.21x10-5 | 0.473502732 |
| <i>ARMS2</i> | rs72830799  | 10:124158516:G:A            | A                | 0.120696653 | Amino Acid       | Histidine Metabolism                         | 1-methyl-4-imidazoleacetate | 0.037864745 | 2.01x10-5 | 0.473502732 |
| <i>ARMS2</i> | rs17649042  | 10:124161144:C:T            | T                | 0.121112971 | Amino Acid       | Histidine Metabolism                         | 1-methyl-4-imidazoleacetate | 0.037864745 | 2.01x10-5 | 0.473502732 |
| <i>ARMS2</i> | rs41307060  | 10:124179096:T:C            | C                | 0.120579498 | Amino Acid       | Histidine Metabolism                         | 1-methyl-4-imidazoleacetate | 0.037864745 | 2.01x10-5 | 0.473502732 |
| <i>ARMS2</i> | rs72832710  | 10:124179856:A:G            | G                | 0.12058159  | Amino Acid       | Histidine Metabolism                         | 1-methyl-4-imidazoleacetate | 0.037864745 | 2.01x10-5 | 0.473502732 |
| <i>CFH</i>   | rs61818956  | 1:196886223:C:T             | T                | 0.133598326 | Amino Acid       | Leucine; Isoleucine and Valine<br>Metabolism | 2-hydroxy-3-methylvalerate  | 0.065649281 | 2.80x10-5 | 0.476773129 |
| <i>ARMS2</i> | rs72834437  | 10:124205304:A:G            | G                | 0.132644351 | Amino Acid       | Histidine Metabolism                         | 1-methyl-4-imidazoleacetate | 0.036107979 | 2.71x10-5 | 0.474393082 |
| <i>ARMS2</i> | rs185803389 | 10:124202647:T:C            | C                | 0.117453975 | Amino Acid       | Histidine Metabolism                         | 1-methyl-4-imidazoleacetate | 0.048043621 | 9.64x10-6 | 0.473502732 |
| <i>ARMS2</i> | rs4752695   | 10:124195041:G:C            | C                | 0.127378661 | Amino Acid       | Histidine Metabolism                         | 1-methyl-4-imidazoleacetate | 0.036387429 | 3.12x10-5 | 0.476773129 |
| <i>ARMS2</i> | rs12218910  | 10:124158082:T:A            | T                | 0.126512552 | Amino Acid       | Histidine Metabolism                         | 1-methyl-4-imidazoleacetate | 0.036026899 | 3.60x10-5 | 0.476773129 |
| <i>ARMS2</i> | rs10399971  | 10:124155845:T:C            | C                | 0.125520921 | Amino Acid       | Histidine Metabolism                         | 1-methyl-4-imidazoleacetate | 0.036026899 | 3.60x10-5 | 0.476773129 |
| <i>ARMS2</i> | rs4752692   | 10:124156852:C:T            | T                | 0.125523013 | Amino Acid       | Histidine Metabolism                         | 1-methyl-4-imidazoleacetate | 0.036026899 | 3.60x10-5 | 0.476773129 |
| <i>ARMS2</i> | rs72830800  | 10:124160106:G:A            | A                | 0.125600418 | Amino Acid       | Histidine Metabolism                         | 1-methyl-4-imidazoleacetate | 0.036026899 | 3.60x10-5 | 0.476773129 |
| <i>ARMS2</i> | rs4752693   | 10:124163611:C:T            | T                | 0.125514644 | Amino Acid       | Histidine Metabolism                         | 1-methyl-4-imidazoleacetate | 0.036026899 | 3.60x10-5 | 0.476773129 |
| <i>ARMS2</i> | rs72830801  | 10:124164988:G:A            | A                | 0.125483264 | Amino Acid       | Histidine Metabolism                         | 1-methyl-4-imidazoleacetate | 0.036026899 | 3.60x10-5 | 0.476773129 |
| <i>ARMS2</i> | rs7084703   | 10:124171079:T:A            | A                | 0.12565272  | Amino Acid       | Histidine Metabolism                         | 1-methyl-4-imidazoleacetate | 0.036026899 | 3.60x10-5 | 0.476773129 |
| <i>ARMS2</i> | rs72832707  | 10:124177898:C:T            | T                | 0.125391213 | Amino Acid       | Histidine Metabolism                         | 1-methyl-4-imidazoleacetate | 0.036026899 | 3.60x10-5 | 0.476773129 |
| <i>ARMS2</i> | rs41317040  | 10:124183181:C:T            | T                | 0.125317992 | Amino Acid       | Histidine Metabolism                         | 1-methyl-4-imidazoleacetate | 0.036026899 | 3.60x10-5 | 0.476773129 |
| <i>ARMS2</i> | rs9783213   | 10:124184567:G:A            | A                | 0.125366109 | Amino Acid       | Histidine Metabolism                         | 1-methyl-4-imidazoleacetate | 0.036026899 | 3.60x10-5 | 0.476773129 |
| <i>ARMS2</i> | rs952508    | 10:124187107:G:A            | A                | 0.125301255 | Amino Acid       | Histidine Metabolism                         | 1-methyl-4-imidazoleacetate | 0.036026899 | 3.60x10-5 | 0.476773129 |
| <i>ARMS2</i> | rs72832715  | 10:124188743:G:A            | A                | 0.125349372 | Amino Acid       | Histidine Metabolism                         | 1-methyl-4-imidazoleacetate | 0.036026899 | 3.60x10-5 | 0.476773129 |
| <i>ARMS2</i> | rs72832716  | 10:124189113:G:A            | A                | 0.125351464 | Amino Acid       | Histidine Metabolism                         | 1-methyl-4-imidazoleacetate | 0.036026899 | 3.60x10-5 | 0.476773129 |
| <i>ARMS2</i> | rs17103541  | 10:124190121:A:G            | G                | 0.12534728  | Amino Acid       | Histidine Metabolism                         | 1-methyl-4-imidazoleacetate | 0.036026899 | 3.60x10-5 | 0.476773129 |
| <i>ARMS2</i> | rs143086805 | 10:124190753:CAGCTCCCGAGT:C | C                | 0.125343096 | Amino Acid       | Histidine Metabolism                         | 1-methyl-4-imidazoleacetate | 0.036026899 | 3.60x10-5 | 0.476773129 |

|                |             |                    |     |             |            |                                                  |                                             |              |           |             |
|----------------|-------------|--------------------|-----|-------------|------------|--------------------------------------------------|---------------------------------------------|--------------|-----------|-------------|
| <i>ARMS2</i>   | rs72832718  | 10:124192245:C:T   | T   | 0.125338912 | Amino Acid | Histidine Metabolism                             | 1-methyl-4-imidazoleacetate                 | 0.036026899  | 3.60x10-5 | 0.476773129 |
| <i>ARMS2</i>   | rs10510111  | 10:124192474:A:C   | C   | 0.125328452 | Amino Acid | Histidine Metabolism                             | 1-methyl-4-imidazoleacetate                 | 0.036026899  | 3.60x10-5 | 0.476773129 |
| <i>ARMS2</i>   | rs143158497 | 10:124202660:T:A   | A   | 0.132761506 | Amino Acid | Histidine Metabolism                             | 1-methyl-4-imidazoleacetate                 | 0.042489907  | 1.91x10-5 | 0.473502732 |
| <i>ARMS2</i>   | rs72834434  | 10:124202251:A:T   | T   | 0.127364017 | Amino Acid | Histidine Metabolism                             | 1-methyl-4-imidazoleacetate                 | 0.036611306  | 3.51x10-5 | 0.476773129 |
| <i>BTBD16</i>  | rs10887143  | 10:124113899:G:A   | A   | 0.235757322 | Amino Acid | Methionine; Cysteine; SAM and Taurine Metabolism | methionine                                  | -0.009638301 | 3.34x10-5 | 0.476773129 |
| <i>ARMS2</i>   | rs190025001 | 10:124202617:G:C   | C   | 0.116002092 | Amino Acid | Histidine Metabolism                             | 1-methyl-4-imidazoleacetate                 | 0.044837822  | 2.08x10-5 | 0.473502732 |
| <i>ARMS2</i>   | rs180901369 | 10:124202618:G:A   | A   | 0.116008368 | Amino Acid | Histidine Metabolism                             | 1-methyl-4-imidazoleacetate                 | 0.044837822  | 2.08x10-5 | 0.473502732 |
| <i>ASPM</i>    | rs199801555 | 1:197116704:GA:G   | G   | 0.059290795 | Amino Acid | Phenylalanine Metabolism                         | phenyllactate (PLA)                         | 0.09892687   | 2.67x10-6 | 0.386955394 |
| <i>ASPM</i>    | rs61819094  | 1:197119778:C:G    | G   | 0.059307531 | Amino Acid | Phenylalanine Metabolism                         | phenyllactate (PLA)                         | 0.09892687   | 2.67x10-6 | 0.386955394 |
| <i>ARMS2</i>   | rs7904674   | 10:124114356:A:G   | G   | 0.23432636  | Amino Acid | Methionine; Cysteine; SAM and Taurine Metabolism | methionine                                  | -0.009559609 | 3.91x10-5 | 0.478844751 |
| <i>ASPM</i>    | rs201247969 | 1:196958216:G:GTT  | GTT | 0.056182008 | Amino Acid | Phenylalanine Metabolism                         | phenyllactate (PLA)                         | 0.092782957  | 2.03x10-5 | 0.473502732 |
| <i>C6orf15</i> | rs114941286 | 6:31109882:G:T     | G   | 0.472786611 | Amino Acid | Leucine; Isoleucine and Valine Metabolism        | 3-methylglutaconate                         | -0.037595286 | 3.20x10-5 | 0.476773129 |
| <i>LIPC</i>    | rs1532085   | 15:58683366:A:G    | A   | 0.382845188 | Lipid      | Phosphatidylethanolamine (PE)                    | 1-palmitoyl-2-arachidonoyl-GPE (16:0/20:4)* | 0.028891773  | 9.47x10-9 | 0.012350644 |
| <i>LIPC</i>    | rs2043085   | 15:58680954:T:C    | T   | 0.396811715 | Lipid      | Phosphatidylethanolamine (PE)                    | 1-palmitoyl-2-arachidonoyl-GPE (16:0/20:4)* | 0.027389077  | 9.03x10-8 | 0.065234074 |
| <i>LIPC</i>    | rs261291    | 15:58680178:T:C    | C   | 0.356677824 | Lipid      | Phosphatidylethanolamine (PE)                    | 1-palmitoyl-2-arachidonoyl-GPE (16:0/20:4)* | 0.02574477   | 7.88x10-7 | 0.172730619 |
| <i>LIPC</i>    | rs261291    | 15:58680178:T:C    | C   | 0.356677824 | Lipid      | Phosphatidylethanolamine (PE)                    | 1-palmitoyl-2-linoleoyl-GPE (16:0/18:2)     | 0.038734368  | 8.02x10-9 | 0.012350644 |
| <i>LIPC</i>    | rs2414577   | 15:58680638:T:C    | C   | 0.393801255 | Lipid      | Phosphatidylethanolamine (PE)                    | 1-palmitoyl-2-arachidonoyl-GPE (16:0/20:4)* | 0.024142191  | 5.99x10-6 | 0.473502732 |
| <i>LIPC</i>    | rs2414578   | 15:58680639:T:C    | C   | 0.393801255 | Lipid      | Phosphatidylethanolamine (PE)                    | 1-palmitoyl-2-arachidonoyl-GPE (16:0/20:4)* | 0.024142191  | 5.99x10-6 | 0.473502732 |
| <i>LIPC</i>    | rs7350789   | 15:58679668:G:A    | A   | 0.343098326 | Lipid      | Phosphatidylethanolamine (PE)                    | 1-palmitoyl-2-arachidonoyl-GPE (16:0/20:4)* | 0.022944219  | 1.22x10-5 | 0.473502732 |
| <i>LIPC</i>    | rs71884092  | 15:58679807:CAGA:C | C   | 0.343041841 | Lipid      | Phosphatidylethanolamine (PE)                    | 1-palmitoyl-2-arachidonoyl-GPE (16:0/20:4)* | 0.022944219  | 1.22x10-5 | 0.473502732 |
| <i>LIPC</i>    | rs7177289   | 15:58680184:C:T    | T   | 0.34292887  | Lipid      | Phosphatidylethanolamine (PE)                    | 1-palmitoyl-2-arachidonoyl-GPE (16:0/20:4)* | 0.022639839  | 1.88x10-5 | 0.473502732 |
| <i>LIPC</i>    | rs261290    | 15:58678720:T:C    | T   | 0.344997908 | Lipid      | Phosphatidylethanolamine (PE)                    | 1-palmitoyl-2-arachidonoyl-GPE (16:0/20:4)* | 0.022437393  | 1.75x10-5 | 0.473502732 |
| <i>LIPC</i>    | rs35853021  | 15:58680643:G:T    | T   | 0.36308159  | Lipid      | Phosphatidylethanolamine (PE)                    | 1-palmitoyl-2-arachidonoyl-GPE (16:0/20:4)* | 0.024103902  | 1.05x10-5 | 0.473502732 |
| <i>LIPC</i>    | rs2043085   | 15:58680954:T:C    | T   | 0.396811715 | Lipid      | Phosphatidylethanolamine (PE)                    | 1-palmitoyl-2-linoleoyl-GPE (16:0/18:2)     | 0.033484624  | 5.68x10-7 | 0.1482541   |
| <i>LIPC</i>    | rs261290    | 15:58678720:T:C    | T   | 0.344997908 | Lipid      | Phosphatidylethanolamine (PE)                    | 1-palmitoyl-2-linoleoyl-GPE (16:0/18:2)     | 0.034972653  | 2.04x10-7 | 0.076155012 |
| <i>LIPC</i>    | rs1532085   | 15:58683366:A:G    | A   | 0.382845188 | Lipid      | Phosphatidylethanolamine (PE)                    | 1-palmitoyl-2-linoleoyl-GPE (16:0/18:2)     | 0.033243529  | 4.87x10-7 | 0.141010376 |
| <i>LIPC</i>    | rs7350789   | 15:58679668:G:A    | A   | 0.343098326 | Lipid      | Phosphatidylethanolamine (PE)                    | 1-palmitoyl-2-linoleoyl-GPE (16:0/18:2)     | 0.035722865  | 1.25x10-7 | 0.065234074 |
| <i>LIPC</i>    | rs71884092  | 15:58679807:CAGA:C | C   | 0.343041841 | Lipid      | Phosphatidylethanolamine (PE)                    | 1-palmitoyl-2-linoleoyl-GPE (16:0/18:2)     | 0.035722865  | 1.25x10-7 | 0.065234074 |
| <i>LIPC</i>    | rs2043082   | 15:58674308:G:A    | A   | 0.34890795  | Lipid      | Phosphatidylethanolamine (PE)                    | 1-palmitoyl-2-arachidonoyl-GPE (16:0/20:4)* | 0.022255557  | 1.64x10-5 | 0.473502732 |
| <i>LIPC</i>    | rs7177289   | 15:58680184:C:T    | T   | 0.34292887  | Lipid      | Phosphatidylethanolamine (PE)                    | 1-palmitoyl-2-linoleoyl-GPE (16:0/18:2)     | 0.034949836  | 3.02x10-7 | 0.098491479 |
| <i>LIPC</i>    | rs10468017  | 15:58678512:C:T    | T   | 0.302142259 | Lipid      | Phosphatidylethanolamine (PE)                    | 1-palmitoyl-2-linoleoyl-GPE (16:0/18:2)     | 0.035042586  | 8.61x10-7 | 0.172730619 |
| <i>LIPC</i>    | rs35853021  | 15:58680643:G:T    | T   | 0.36308159  | Lipid      | Phosphatidylethanolamine (PE)                    | 1-palmitoyl-2-linoleoyl-GPE (16:0/18:2)     | 0.037006949  | 1.55x10-7 | 0.067330853 |
| <i>ADAMTS9</i> | rs34522141  | 3:64727302:AT:A    | A   | 0.472901674 | Lipid      | Primary Bile Acid Metabolism                     | glycochenodeoxycholate sulfate              | -0.077516557 | 9.01x10-6 | 0.473502732 |
| <i>LIPC</i>    | rs261291    | 15:58680178:T:C    | C   | 0.356677824 | Lipid      | Phosphatidylethanolamine (PE)                    | 1-stearoyl-2-linoleoyl-GPE (18:0/18:2)*     | 0.023369644  | 1.94x10-5 | 0.473502732 |
| <i>ADAMTS9</i> | rs2194091   | 3:64725485:G:A     | G   | 0.401621339 | Lipid      | Primary Bile Acid Metabolism                     | glycochenodeoxycholate sulfate              | -0.072672425 | 3.01x10-5 | 0.476773129 |

|                |            |                  |   |             |       |                                       |                                                  |              |                       |             |
|----------------|------------|------------------|---|-------------|-------|---------------------------------------|--------------------------------------------------|--------------|-----------------------|-------------|
| <i>ADAMTS9</i> | rs7638389  | 3:64729892:G:A   | G | 0.403843096 | Lipid | Primary Bile Acid Metabolism          | glycochenodeoxycholate sulfate                   | -0.073313065 | 3.14x10 <sup>-5</sup> | 0.476773129 |
| <i>LIPC</i>    | rs2414577  | 15:58680638:T:C  | C | 0.393801255 | Lipid | Phosphatidylethanolamine (PE)         | 1-palmitoyl-2-linoleoyl-GPE (16:0/18:2)          | 0.033100281  | 1.73x10 <sup>-6</sup> | 0.282422896 |
| <i>LIPC</i>    | rs2414578  | 15:58680639:T:C  | C | 0.393801255 | Lipid | Phosphatidylethanolamine (PE)         | 1-palmitoyl-2-linoleoyl-GPE (16:0/18:2)          | 0.033100281  | 1.73x10 <sup>-6</sup> | 0.282422896 |
| <i>ADAMTS9</i> | rs6793651  | 3:64729712:G:A   | G | 0.40975523  | Lipid | Primary Bile Acid Metabolism          | glycochenodeoxycholate sulfate                   | -0.073576365 | 3.35x10 <sup>-5</sup> | 0.476773129 |
|                | rs1341393  | 10:124512299:A:C | A | 0.069039749 | Lipid | Medium Chain Fatty Acid               | caprate (10:0)                                   | 0.060058271  | 3.22x10 <sup>-5</sup> | 0.476773129 |
| <i>ADAMTS9</i> | rs17676309 | 3:64730121:T:C   | C | 0.429008368 | Lipid | Primary Bile Acid Metabolism          | glycochenodeoxycholate sulfate                   | 0.07953244   | 5.75x10 <sup>-6</sup> | 0.473502732 |
| <i>ARMS2</i>   | rs10887149 | 10:124167004:G:A | A | 0.347280335 | Lipid | Long Chain Fatty Acid                 | 10-nonadecenoate (19:1n9)                        | 0.015458338  | 8.51x10 <sup>-6</sup> | 0.473502732 |
| <i>ADAMTS9</i> | rs13096392 | 3:64722611:G:T   | T | 0.425794979 | Lipid | Primary Bile Acid Metabolism          | glycochenodeoxycholate sulfate                   | 0.076741639  | 9.29x10 <sup>-6</sup> | 0.473502732 |
| <i>ADAMTS9</i> | rs6445425  | 3:64719091:G:C   | G | 0.424518828 | Lipid | Primary Bile Acid Metabolism          | glycochenodeoxycholate sulfate                   | 0.076330917  | 1.05x10 <sup>-5</sup> | 0.473502732 |
| <i>ADAMTS9</i> | rs6775974  | 3:64724632:C:T   | T | 0.427112971 | Lipid | Primary Bile Acid Metabolism          | glycochenodeoxycholate sulfate                   | 0.076280484  | 1.07x10 <sup>-5</sup> | 0.473502732 |
| <i>ADAMTS9</i> | rs4368494  | 3:64701387:G:A   | A | 0.473585774 | Lipid | Primary Bile Acid Metabolism          | glycochenodeoxycholate sulfate                   | -0.068660316 | 3.26x10 <sup>-5</sup> | 0.476773129 |
| <i>ADAMTS9</i> | rs4422297  | 3:64704860:A:G   | G | 0.482717573 | Lipid | Primary Bile Acid Metabolism          | glycochenodeoxycholate sulfate                   | -0.069026779 | 3.80x10 <sup>-5</sup> | 0.476773129 |
| <i>ADAMTS9</i> | rs9864077  | 3:64704891:T:C   | C | 0.482686192 | Lipid | Primary Bile Acid Metabolism          | glycochenodeoxycholate sulfate                   | -0.069026779 | 3.80x10 <sup>-5</sup> | 0.476773129 |
| <i>ADAMTS9</i> | rs9860221  | 3:64700799:A:G   | G | 0.483186192 | Lipid | Primary Bile Acid Metabolism          | glycochenodeoxycholate sulfate                   | -0.069048685 | 3.78x10 <sup>-5</sup> | 0.476773129 |
| <i>ADAMTS9</i> | rs9860730  | 3:64701146:A:G   | G | 0.483150628 | Lipid | Primary Bile Acid Metabolism          | glycochenodeoxycholate sulfate                   | -0.069048685 | 3.78x10 <sup>-5</sup> | 0.476773129 |
| <i>ADAMTS9</i> | rs6772129  | 3:64700425:A:G   | G | 0.483248954 | Lipid | Primary Bile Acid Metabolism          | glycochenodeoxycholate sulfate                   | -0.069048685 | 3.78x10 <sup>-5</sup> | 0.476773129 |
| <i>BTBD16</i>  | rs7074542  | 10:124112799:C:T | T | 0.29198954  | Lipid | Fatty Acid Metabolism(Acyl Carnitine) | lignoceroylcarnitine (C24)*                      | 0.023487503  | 2.83x10 <sup>-5</sup> | 0.476773129 |
| <i>BTBD16</i>  | rs61871680 | 10:124070455:G:A | A | 0.137776151 | Lipid | Plasmalogen                           | 1-(1-enyl-palmitoyl)-2-oleoyl-GPC (P-16:0/18:1)* | 0.023348014  | 9.25x10 <sup>-6</sup> | 0.473502732 |
| <i>ADAMTS9</i> | rs4607103  | 3:64711904:C:T   | T | 0.401845188 | Lipid | Primary Bile Acid Metabolism          | glycochenodeoxycholate sulfate                   | -0.069482431 | 4.29x10 <sup>-5</sup> | 0.484500525 |
| <i>ADAMTS9</i> | rs4504165  | 3:64701890:T:C   | C | 0.483075314 | Lipid | Primary Bile Acid Metabolism          | glycochenodeoxycholate sulfate                   | -0.069026779 | 3.80x10 <sup>-5</sup> | 0.476773129 |
| <i>ADAMTS9</i> | rs9870322  | 3:64706499:T:C   | C | 0.482531381 | Lipid | Primary Bile Acid Metabolism          | glycochenodeoxycholate sulfate                   | -0.069026779 | 3.80x10 <sup>-5</sup> | 0.476773129 |
| <i>ADAMTS9</i> | rs9816778  | 3:64706820:A:G   | G | 0.48257113  | Lipid | Primary Bile Acid Metabolism          | glycochenodeoxycholate sulfate                   | -0.069026779 | 3.80x10 <sup>-5</sup> | 0.476773129 |
| <i>ADAMTS9</i> | rs4132228  | 3:64708114:C:T   | T | 0.470721757 | Lipid | Primary Bile Acid Metabolism          | glycochenodeoxycholate sulfate                   | -0.068192132 | 3.86x10 <sup>-5</sup> | 0.478844751 |
| <i>CETP</i>    | rs3816117  | 16:56996158:T:C  | C | 0.4941653   | Lipid | Ketone Bodies                         | 3-hydroxybutyrate (BHBA)                         | 0.048851386  | 2.69x10 <sup>-5</sup> | 0.474393082 |
| <i>LIPC</i>    | rs35853021 | 15:58680643:G:T  | T | 0.36308159  | Lipid | Phosphatidylethanolamine (PE)         | 1-stearoyl-2-linoleoyl-GPE (18:0/18:2)*          | 0.023381002  | 4.34x10 <sup>-5</sup> | 0.488337809 |
| <i>BTBD16</i>  | rs35444643 | 10:124111173:G:T | T | 0.291625523 | Lipid | Fatty Acid Metabolism(Acyl Carnitine) | lignoceroylcarnitine (C24)*                      | 0.02324521   | 3.36x10 <sup>-5</sup> | 0.476773129 |
| <i>ARMS2</i>   | rs7088058  | 10:124149352:C:T | T | 0.416880753 | Lipid | Long Chain Fatty Acid                 | 10-nonadecenoate (19:1n9)                        | 0.014678839  | 2.65x10 <sup>-5</sup> | 0.474393082 |
| <i>BTBD16</i>  | rs11200571 | 10:124110966:A:G | G | 0.291922594 | Lipid | Fatty Acid Metabolism(Acyl Carnitine) | lignoceroylcarnitine (C24)*                      | 0.02324521   | 3.36x10 <sup>-5</sup> | 0.476773129 |
| <i>ARMS2</i>   | rs17564097 | 10:124194816:A:G | G | 0.181284519 | Lipid | Long Chain Fatty Acid                 | 10-nonadecenoate (19:1n9)                        | 0.018755995  | 2.18x10 <sup>-5</sup> | 0.473502732 |
| <i>ARMS2</i>   | rs7918867  | 10:124169666:G:A | A | 0.179935146 | Lipid | Long Chain Fatty Acid                 | 10-nonadecenoate (19:1n9)                        | 0.018754868  | 2.08x10 <sup>-5</sup> | 0.473502732 |
| <i>ARMS2</i>   | rs10887147 | 10:124153631:C:T | T | 0.177161088 | Lipid | Long Chain Fatty Acid                 | 10-nonadecenoate (19:1n9)                        | 0.018913701  | 2.03x10 <sup>-5</sup> | 0.473502732 |
| <i>ARMS2</i>   | rs10749467 | 10:124145712:T:C | C | 0.179665272 | Lipid | Long Chain Fatty Acid                 | 10-nonadecenoate (19:1n9)                        | 0.018754868  | 2.08x10 <sup>-5</sup> | 0.473502732 |
| <i>ARMS2</i>   | rs7089398  | 10:124146298:G:A | A | 0.179759414 | Lipid | Long Chain Fatty Acid                 | 10-nonadecenoate (19:1n9)                        | 0.018754868  | 2.08x10 <sup>-5</sup> | 0.473502732 |
| <i>ARMS2</i>   | rs7905479  | 10:124160126:C:T | T | 0.180497908 | Lipid | Long Chain Fatty Acid                 | 10-nonadecenoate (19:1n9)                        | 0.018754868  | 2.08x10 <sup>-5</sup> | 0.473502732 |
| <i>ARMS2</i>   | rs4751892  | 10:124175273:G:A | G | 0.180146444 | Lipid | Long Chain Fatty Acid                 | 10-nonadecenoate (19:1n9)                        | 0.018754868  | 2.08x10 <sup>-5</sup> | 0.473502732 |

|       |             |                      |       |             |       |                                        |                                                  |              |           |             |
|-------|-------------|----------------------|-------|-------------|-------|----------------------------------------|--------------------------------------------------|--------------|-----------|-------------|
| ARMS2 | rs4405249   | 10:124183732:T:C     | T     | 0.179916318 | Lipid | Long Chain Fatty Acid                  | 10-nonadecenoate (19:1n9)                        | 0.018754868  | 2.08x10-5 | 0.473502732 |
| ARMS2 | rs41310276  | 10:124166018:T:G     | G     | 0.180058577 | Lipid | Long Chain Fatty Acid                  | 10-nonadecenoate (19:1n9)                        | 0.018758243  | 2.12x10-5 | 0.473502732 |
| ARMS2 | rs117169865 | 10:124168064:T:C     | C     | 0.180027197 | Lipid | Long Chain Fatty Acid                  | 10-nonadecenoate (19:1n9)                        | 0.018758243  | 2.12x10-5 | 0.473502732 |
| ARMS2 | rs6585826   | 10:124141971:G:A     | A     | 0.17907113  | Lipid | Long Chain Fatty Acid                  | 10-nonadecenoate (19:1n9)                        | 0.01923306   | 2.00x10-5 | 0.473502732 |
| ARMS2 | rs144969330 | 10:124194071:CT:C    | C     | 0.179410042 | Lipid | Long Chain Fatty Acid                  | 10-nonadecenoate (19:1n9)                        | 0.018700368  | 2.22x10-5 | 0.473502732 |
| LIPC  | rs2043082   | 15:58674308:G:A      | A     | 0.34890795  | Lipid | Phosphatidylethanolamine (PE)          | 1-palmitoyl-2-linoleoyl-GPE (16:0/18:2)          | 0.030113512  | 7.18x10-6 | 0.473502732 |
| CETP  | rs1800775   | 16:56995236:C:A      | A     | 0.493728    | Lipid | Ketone Bodies                          | 3-hydroxybutyrate (BHBA)                         | 0.047664637  | 3.92x10-5 | 0.478844751 |
| ARMS2 | rs79296899  | 10:124201412:A:G     | G     | 0.181393305 | Lipid | Long Chain Fatty Acid                  | 10-nonadecenoate (19:1n9)                        | 0.018424475  | 3.05x10-5 | 0.476773129 |
| ARMS2 | rs3037926   | 10:124138378:CACTT:C | C     | 0.17842887  | Lipid | Long Chain Fatty Acid                  | 10-nonadecenoate (19:1n9)                        | 0.018995348  | 2.66x10-5 | 0.474393082 |
| ARMS2 | rs10692165  | 10:124140752:CAG:C   | C     | 0.178830544 | Lipid | Long Chain Fatty Acid                  | 10-nonadecenoate (19:1n9)                        | 0.018995348  | 2.66x10-5 | 0.474393082 |
| ARMS2 | rs7900012   | 10:124134042:C:T     | T     | 0.178054393 | Lipid | Long Chain Fatty Acid                  | 10-nonadecenoate (19:1n9)                        | 0.018995348  | 2.66x10-5 | 0.474393082 |
| ARMS2 | rs10617127  | 10:124135004:C:CGTCT | CGTCT | 0.178198745 | Lipid | Long Chain Fatty Acid                  | 10-nonadecenoate (19:1n9)                        | 0.018995348  | 2.66x10-5 | 0.474393082 |
| HCG26 | rs114337491 | 6:31346621:G:C       | C     | 0.171548117 | Lipid | Hexosylceramides (HCER)                | glycosyl-N-nervonoyl-sphingosine (d18:1/24:1)*   | 0.051624252  | 3.16x10-5 | 0.476773129 |
| ARMS2 | rs7098059   | 10:124144482:A:T     | T     | 0.179491632 | Lipid | Long Chain Fatty Acid                  | 10-nonadecenoate (19:1n9)                        | 0.01861258   | 3.54x10-5 | 0.476773129 |
| ASPM  | rs72738644  | 1:197137448:C:T      | T     | 0.082215481 | Lipid | Androgenic Steroids                    | androstenediol (3alpha; 17alpha) monosulfate (2) | -0.09655273  | 1.50x10-5 | 0.473502732 |
| ARMS2 | rs6585823   | 10:124126984:T:G     | T     | 0.177399582 | Lipid | Long Chain Fatty Acid                  | 10-nonadecenoate (19:1n9)                        | 0.018978264  | 2.79x10-5 | 0.476773129 |
| ARMS2 | rs7896201   | 10:124127578:T:G     | T     | 0.177359833 | Lipid | Long Chain Fatty Acid                  | 10-nonadecenoate (19:1n9)                        | 0.018978264  | 2.79x10-5 | 0.476773129 |
| LIPC  | rs1601935   | 15:58671765:G:T      | G     | 0.390322176 | Lipid | Phosphatidylethanolamine (PE)          | 1-palmitoyl-2-linoleoyl-GPE (16:0/18:2)          | 0.029955467  | 1.55x10-5 | 0.473502732 |
| LIPC  | rs11858759  | 15:58676821:G:A      | A     | 0.310621339 | Lipid | Phosphatidylethanolamine (PE)          | 1-palmitoyl-2-linoleoyl-GPE (16:0/18:2)          | 0.028540178  | 4.29x10-5 | 0.484500525 |
| ARMS2 | rs2178931   | 10:124206126:A:G     | G     | 0.181600418 | Lipid | Long Chain Fatty Acid                  | 10-nonadecenoate (19:1n9)                        | 0.017748747  | 4.27x10-5 | 0.484500525 |
| C3    | rs2241392   | 19:6685983:G:C       | C     | 0.314426778 | Lipid | Polyunsaturated Fatty Acid (n3 and n6) | linoleate (18:2n6)                               | -0.023250748 | 3.86x10-6 | 0.473502732 |
| ARMS2 | rs79406060  | 10:124287408:T:A     | A     | 0.133351464 | Lipid | Primary Bile Acid Metabolism           | glycochenodeoxycholate glucuronide (1)           | 0.113363039  | 2.56x10-5 | 0.474393082 |
| ARMS2 | rs7091993   | 10:124119639:T:C     | C     | 0.23417364  | Lipid | Fatty Acid Metabolism(Acyl Carnitine)  | behenoylecarnitine (C22)*                        | 0.040353475  | 3.57x10-5 | 0.476773129 |
| ARMS2 | rs11596636  | 10:124120567:A:G     | G     | 0.234399582 | Lipid | Fatty Acid Metabolism(Acyl Carnitine)  | behenoylecarnitine (C22)*                        | 0.040353475  | 3.57x10-5 | 0.476773129 |
| LIPC  | rs62001736  | 15:58674051:G:A      | A     | 0.3106841   | Lipid | Phosphatidylethanolamine (PE)          | 1-palmitoyl-2-linoleoyl-GPE (16:0/18:2)          | 0.02879768   | 4.05x10-5 | 0.48038381  |
| ARMS2 | rs7904674   | 10:124114356:A:G     | G     | 0.23432636  | Lipid | Fatty Acid Metabolism(Acyl Carnitine)  | behenoylecarnitine (C22)*                        | 0.040130134  | 4.28x10-5 | 0.484500525 |
| ARMS2 | rs10887154  | 10:124255340:T:C     | C     | 0.129707113 | Lipid | Primary Bile Acid Metabolism           | glycochenodeoxycholate glucuronide (1)           | 0.115313504  | 1.46x10-5 | 0.473502732 |
| ARMS2 | rs11200655  | 10:124260564:C:G     | G     | 0.129958159 | Lipid | Primary Bile Acid Metabolism           | glycochenodeoxycholate glucuronide (1)           | 0.115313504  | 1.46x10-5 | 0.473502732 |
| ARMS2 | rs17103659  | 10:124274603:T:C     | C     | 0.131947699 | Lipid | Primary Bile Acid Metabolism           | glycochenodeoxycholate glucuronide (1)           | 0.111904188  | 2.43x10-5 | 0.473502732 |
| ARMS2 | rs74532199  | 10:124274615:C:CT    | CT    | 0.13189749  | Lipid | Primary Bile Acid Metabolism           | glycochenodeoxycholate glucuronide (1)           | 0.111904188  | 2.43x10-5 | 0.473502732 |
| ARMS2 | rs1009326   | 10:124263873:C:T     | T     | 0.130464435 | Lipid | Primary Bile Acid Metabolism           | glycochenodeoxycholate glucuronide (1)           | 0.114830824  | 1.61x10-5 | 0.473502732 |
| ARMS2 | rs17103667  | 10:124277713:G:A     | A     | 0.131780335 | Lipid | Primary Bile Acid Metabolism           | glycochenodeoxycholate glucuronide (1)           | 0.111904188  | 2.43x10-5 | 0.473502732 |
| ARMS2 | rs28482003  | 10:124277734:G:A     | A     | 0.131788703 | Lipid | Primary Bile Acid Metabolism           | glycochenodeoxycholate glucuronide (1)           | 0.111904188  | 2.43x10-5 | 0.473502732 |
| ARMS2 | rs28738684  | 10:124277745:G:A     | A     | 0.131803347 | Lipid | Primary Bile Acid Metabolism           | glycochenodeoxycholate glucuronide (1)           | 0.111904188  | 2.43x10-5 | 0.473502732 |
| ARMS2 | rs7077251   | 10:124278286:A:G     | G     | 0.131956067 | Lipid | Primary Bile Acid Metabolism           | glycochenodeoxycholate glucuronide (1)           | 0.111904188  | 2.43x10-5 | 0.473502732 |

|               |             |                  |   |             |            |                                       |                                              |             |                       |             |
|---------------|-------------|------------------|---|-------------|------------|---------------------------------------|----------------------------------------------|-------------|-----------------------|-------------|
| <i>ARMS2</i>  | rs28372488  | 10:124278854:G:A | A | 0.132085774 | Lipid      | Primary Bile Acid Metabolism          | glycochenodeoxycholate glucuronide (1)       | 0.111904188 | 2.43x10 <sup>-5</sup> | 0.473502732 |
| <i>ARMS2</i>  | rs74231270  | 10:124282569:A:T | T | 0.132807531 | Lipid      | Primary Bile Acid Metabolism          | glycochenodeoxycholate glucuronide (1)       | 0.112525351 | 2.27x10 <sup>-5</sup> | 0.473502732 |
| <i>ARMS2</i>  | rs28406792  | 10:124276253:T:A | A | 0.131767782 | Lipid      | Primary Bile Acid Metabolism          | glycochenodeoxycholate glucuronide (1)       | 0.111904188 | 2.43x10 <sup>-5</sup> | 0.473502732 |
| <i>ARMS2</i>  | rs17103662  | 10:124276260:G:A | A | 0.131767782 | Lipid      | Primary Bile Acid Metabolism          | glycochenodeoxycholate glucuronide (1)       | 0.111904188 | 2.43x10 <sup>-5</sup> | 0.473502732 |
| <i>ARMS2</i>  | rs28437273  | 10:124276794:G:C | C | 0.131767782 | Lipid      | Primary Bile Acid Metabolism          | glycochenodeoxycholate glucuronide (1)       | 0.111904188 | 2.43x10 <sup>-5</sup> | 0.473502732 |
| <i>ARMS2</i>  | rs2239588   | 10:124250093:G:C | C | 0.129629707 | Lipid      | Primary Bile Acid Metabolism          | glycochenodeoxycholate glucuronide (1)       | 0.115313504 | 1.46x10 <sup>-5</sup> | 0.473502732 |
| <i>ARMS2</i>  | rs76495632  | 10:124267250:G:T | T | 0.130811715 | Lipid      | Primary Bile Acid Metabolism          | glycochenodeoxycholate glucuronide (1)       | 0.114830824 | 1.61x10 <sup>-5</sup> | 0.473502732 |
| <i>ARMS2</i>  | rs2300435   | 10:124252279:G:A | A | 0.129144351 | Lipid      | Primary Bile Acid Metabolism          | glycochenodeoxycholate glucuronide (1)       | 0.115313504 | 1.46x10 <sup>-5</sup> | 0.473502732 |
| <i>ARMS2</i>  | rs2300436   | 10:124252285:C:T | T | 0.129146444 | Lipid      | Primary Bile Acid Metabolism          | glycochenodeoxycholate glucuronide (1)       | 0.115313504 | 1.46x10 <sup>-5</sup> | 0.473502732 |
| <i>CCHCR1</i> | rs114972609 | 6:31192796:A:G   | G | 0.449790795 | Lipid      | Sphingosines                          | sphingosine 1-phosphate                      | 0.01966672  | 1.58x10 <sup>-5</sup> | 0.473502732 |
| <i>CCHCR1</i> | rs116365117 | 6:31192797:A:G   | G | 0.449790795 | Lipid      | Sphingosines                          | sphingosine 1-phosphate                      | 0.01966672  | 1.58x10 <sup>-5</sup> | 0.473502732 |
| <i>ARMS2</i>  | rs11528741  | 10:124288467:G:C | C | 0.133560669 | Lipid      | Primary Bile Acid Metabolism          | glycochenodeoxycholate glucuronide (1)       | 0.113363039 | 2.56x10 <sup>-5</sup> | 0.474393082 |
| <i>ARMS2</i>  | rs2268351   | 10:124251098:C:T | T | 0.129150628 | Lipid      | Primary Bile Acid Metabolism          | glycochenodeoxycholate glucuronide (1)       | 0.115313504 | 1.46x10 <sup>-5</sup> | 0.473502732 |
| <i>SYN3</i>   | rs5754226   | 22:33104348:A:G  | G | 0.146682008 | Lipid      | Sphingomyelins                        | stearoyl sphingomyelin (d18:1/18:0)          | 0.01789749  | 2.49x10 <sup>-5</sup> | 0.474393082 |
| <i>ARMS2</i>  | rs17103680  | 10:124282725:C:T | T | 0.135985356 | Lipid      | Primary Bile Acid Metabolism          | glycochenodeoxycholate glucuronide (1)       | 0.112022628 | 2.91x10 <sup>-5</sup> | 0.476773129 |
| <i>ARMS2</i>  | rs1016006   | 10:124248091:A:G | G | 0.127778243 | Lipid      | Primary Bile Acid Metabolism          | glycochenodeoxycholate glucuronide (1)       | 0.115977309 | 1.59x10 <sup>-5</sup> | 0.473502732 |
| <i>ARMS2</i>  | rs17103676  | 10:124281685:G:A | A | 0.135096234 | Lipid      | Primary Bile Acid Metabolism          | glycochenodeoxycholate glucuronide (1)       | 0.110611709 | 3.68x10 <sup>-5</sup> | 0.476773129 |
| <i>CMSS1</i>  | rs56339461  | 3:99466531:A:G   | G | 0.092466527 | Lipid      | Dihydrosphingomyelins                 | myristoyl dihydrosphingomyelin (d18:0/14:0)* | 0.03883923  | 6.23x10 <sup>-6</sup> | 0.473502732 |
| <i>ARMS2</i>  | rs73369702  | 10:124281875:C:A | A | 0.134916318 | Lipid      | Primary Bile Acid Metabolism          | glycochenodeoxycholate glucuronide (1)       | 0.110611709 | 3.68x10 <sup>-5</sup> | 0.476773129 |
| <i>ARMS2</i>  | rs17103678  | 10:124282295:T:C | C | 0.135236402 | Lipid      | Primary Bile Acid Metabolism          | glycochenodeoxycholate glucuronide (1)       | 0.110611709 | 3.68x10 <sup>-5</sup> | 0.476773129 |
| <i>ARMS2</i>  | rs10887155  | 10:124255686:G:T | T | 0.133905858 | Lipid      | Primary Bile Acid Metabolism          | glycochenodeoxycholate glucuronide (1)       | 0.109278137 | 3.81x10 <sup>-5</sup> | 0.476773129 |
| <i>ARMS2</i>  | rs28596486  | 10:124274794:T:C | C | 0.145317992 | Lipid      | Primary Bile Acid Metabolism          | glycochenodeoxycholate glucuronide (1)       | 0.109259653 | 2.94x10 <sup>-5</sup> | 0.476773129 |
| <i>ASPM</i>   | rs7535993   | 1:196976019:C:T  | C | 0.346899582 | Nucleotide | Purine Metabolism; Adenine containing | N6-carbamoylthreonyladenosine                | 0.017192175 | 1.79x10 <sup>-5</sup> | 0.473502732 |
| <i>ASPM</i>   | rs7555070   | 1:196982154:C:T  | C | 0.35033682  | Nucleotide | Purine Metabolism; Adenine containing | N6-carbamoylthreonyladenosine                | 0.016656927 | 2.27x10 <sup>-5</sup> | 0.473502732 |
| <i>CFH</i>    | rs12755054  | 1:196947030:T:C  | C | 0.347682008 | Nucleotide | Purine Metabolism; Adenine containing | N6-carbamoylthreonyladenosine                | 0.016825452 | 1.80x10 <sup>-5</sup> | 0.473502732 |
| <i>CFH</i>    | rs1759016   | 1:196952498:C:T  | T | 0.349995816 | Nucleotide | Purine Metabolism; Adenine containing | N6-carbamoylthreonyladenosine                | 0.016656927 | 2.27x10 <sup>-5</sup> | 0.473502732 |
| <i>ASPM</i>   | rs1750311   | 1:196954225:C:A  | A | 0.349374477 | Nucleotide | Purine Metabolism; Adenine containing | N6-carbamoylthreonyladenosine                | 0.016656927 | 2.27x10 <sup>-5</sup> | 0.473502732 |
| <i>ASPM</i>   | rs1170879   | 1:196956047:G:A  | A | 0.349550209 | Nucleotide | Purine Metabolism; Adenine containing | N6-carbamoylthreonyladenosine                | 0.016656927 | 2.27x10 <sup>-5</sup> | 0.473502732 |
| <i>ASPM</i>   | rs9427664   | 1:196961073:T:A  | A | 0.349794979 | Nucleotide | Purine Metabolism; Adenine containing | N6-carbamoylthreonyladenosine                | 0.016656927 | 2.27x10 <sup>-5</sup> | 0.473502732 |

rsID: reference single nucleotide polymorphism (SNP) cluster ID; CHRPOS - chromosome position; GPE - glycerophosphatidylethanolamine; PT - Portugal; Meta - results from meta-analysis
