# Supplementary material
Source: PubMed Central journal article supplement (PMC9560300)
Supplement: mmc8.pdf [file mmc8.pdf]

Supplementary Table 7. met-QTL for the Coimbra, Portugal, cohort based on False Discovery Rate (q-vale &lt; 0.05) – Controls only

| Gene           | rsID        | CHRPOS<br>(major/ minor) | Effect<br>Allele | MAF      | Super<br>Pathway | Sub Pathway                                          | Metabolite                                         | Beta PT      | P-value PT             | Q-value PT  |
|----------------|-------------|--------------------------|------------------|----------|------------------|------------------------------------------------------|----------------------------------------------------|--------------|------------------------|-------------|
| <i>C3</i>      | rs11569547  | 19:6683622:C:T           | T                | 0.064857 | Amino Acid       | Tyrosine Metabolism                                  | dopamine 3-O-sulfate                               | 0.335870675  | 1.17x10 <sup>-5</sup>  | 0.493060846 |
| <i>C1orf53</i> | rs72744974  | 1:197874385:A:T          | T                | 0.115802 | Lipid            | Lysophospholipid                                     | 1-palmitoleoyl-GPC (16:1)*                         | -0.089311957 | 1.34x10 <sup>-6</sup>  | 0.179789649 |
| <i>C6orf15</i> | rs115997593 | 6:31144717:A:T           | T                | 0.282481 | Lipid            | Phosphatidylethanolamine (PE)                        | 1-oleoyl-2-linoleoyl-GPE (18:1/18:2)*              | -0.168109467 | 1.19x10 <sup>-6</sup>  | 0.179789649 |
| <i>C6orf15</i> | rs147850080 | 6:31153020:T:C           | C                | 0.283881 | Lipid            | Phosphatidylethanolamine (PE)                        | 1-oleoyl-2-linoleoyl-GPE (18:1/18:2)*              | -0.168109467 | 1.19x10 <sup>-6</sup>  | 0.179789649 |
| <i>C6orf15</i> | rs116587946 | 6:31154354:T:A           | A                | 0.283876 | Lipid            | Phosphatidylethanolamine (PE)                        | 1-oleoyl-2-linoleoyl-GPE (18:1/18:2)*              | -0.168109467 | 1.19x10 <sup>-6</sup>  | 0.179789649 |
| <i>C6orf15</i> | rs150602567 | 6:31154434:C:T           | T                | 0.283899 | Lipid            | Phosphatidylethanolamine (PE)                        | 1-oleoyl-2-linoleoyl-GPE (18:1/18:2)*              | -0.168109467 | 1.19x10 <sup>-6</sup>  | 0.179789649 |
| <i>C6orf15</i> | rs149853410 | 6:31163161:A:T           | T                | 0.284349 | Lipid            | Phosphatidylethanolamine (PE)                        | 1-oleoyl-2-linoleoyl-GPE (18:1/18:2)*              | -0.168109467 | 1.19x10 <sup>-6</sup>  | 0.179789649 |
| <i>CCHCR1</i>  | rs115883612 | 6:31183509:G:A           | A                | 0.308248 | Lipid            | Phosphatidylethanolamine (PE)                        | 1-oleoyl-2-linoleoyl-GPE (18:1/18:2)*              | -0.152442672 | 2.64x10 <sup>-6</sup>  | 0.19041804  |
| <i>CCHCR1</i>  | rs114276265 | 6:31187075:C:T           | T                | 0.308247 | Lipid            | Phosphatidylethanolamine (PE)                        | 1-oleoyl-2-linoleoyl-GPE (18:1/18:2)*              | -0.152442672 | 2.64x10 <sup>-6</sup>  | 0.19041804  |
| <i>C6orf15</i> | rs1265094   | 6:31106893:A:G           | A                | 0.431503 | Lipid            | Phosphatidylethanolamine (PE)                        | 1-stearoyl-2-oleoyl-GPE (18:0/18:1)                | 0.095735782  | 9.83x10 <sup>-7</sup>  | 0.179789649 |
| <i>C6orf15</i> | rs116344411 | 6:31111675:C:A           | C                | 0.436082 | Lipid            | Phosphatidylethanolamine (PE)                        | 1-stearoyl-2-oleoyl-GPE (18:0/18:1)                | 0.095735782  | 9.83x10 <sup>-7</sup>  | 0.179789649 |
| <i>C6orf15</i> | rs115925201 | 6:31112075:G:A           | G                | 0.436082 | Lipid            | Phosphatidylethanolamine (PE)                        | 1-stearoyl-2-oleoyl-GPE (18:0/18:1)                | 0.095735782  | 9.83x10 <sup>-7</sup>  | 0.179789649 |
| <i>C6orf15</i> | rs114941286 | 6:31109882:G:T           | G                | 0.468627 | Lipid            | Phosphatidylethanolamine (PE)                        | 1-stearoyl-2-oleoyl-GPE (18:0/18:1)                | 0.095485524  | 2.43x10 <sup>-6</sup>  | 0.19041804  |
| <i>BTBD16</i>  | rs11200536  | 10:124052216:G:A         | A                | 0.165514 | Lipid            | Dihydrosphingomyelins                                | behenoyl dihydrosphingomyelin (d18:0/22:0)*        | -0.123879569 | 1.20x10 <sup>-5</sup>  | 0.496557331 |
| <i>CFH</i>     | rs76378524  | 1:196143649:T:C          | C                | 0.067303 | Lipid            | Primary Bile Acid Metabolism                         | glycocholate                                       | 0.333072077  | 9.30x10 <sup>-6</sup>  | 0.432978302 |
| <i>CFH</i>     | rs191468419 | 1:196157574:A:G          | G                | 0.067953 | Lipid            | Primary Bile Acid Metabolism                         | glycocholate                                       | 0.333072077  | 9.30x10 <sup>-6</sup>  | 0.432978302 |
| <i>CFH</i>     | rs16839652  | 1:196165797:C:A          | A                | 0.068044 | Lipid            | Primary Bile Acid Metabolism                         | glycocholate                                       | 0.333072077  | 9.30x10 <sup>-6</sup>  | 0.432978302 |
| <i>CFH</i>     | rs2094029   | 1:196166278:T:C          | C                | 0.068082 | Lipid            | Primary Bile Acid Metabolism                         | glycocholate                                       | 0.333072077  | 9.30x10 <sup>-6</sup>  | 0.432978302 |
| <i>CFH</i>     | rs76374435  | 1:196168664:A:T          | T                | 0.068185 | Lipid            | Primary Bile Acid Metabolism                         | glycocholate                                       | 0.333072077  | 9.30x10 <sup>-6</sup>  | 0.432978302 |
| <i>C6orf15</i> | rs115593773 | 6:31164763:A:G           | G                | 0.067012 | Lipid            | Androgenic Steroids                                  | 5alpha-androstan-3beta;17beta-diol monosulfate (2) | 0.213659162  | 2.65x10 <sup>-6</sup>  | 0.19041804  |
| <i>ASPM</i>    | rs75797460  | 1:197039343:G:A          | A                | 0.144775 | Nucleotide       | Pyrimidine Metabolism; Orotate containing            | orotate                                            | 0.273978327  | 1.52x10 <sup>-10</sup> | 0.000127395 |
| <i>CFH</i>     | rs146690273 | 1:196946050:T:G          | G                | 0.133725 | Nucleotide       | Pyrimidine Metabolism; Orotate containing            | orotate                                            | 0.274796975  | 1.95x10 <sup>-10</sup> | 0.000127395 |
| <i>ASPM</i>    | rs75797460  | 1:197039343:G:A          | A                | 0.144775 | Nucleotide       | Pyrimidine Metabolism; Orotate containing            | orotidine                                          | 0.5106712    | 1.48x10 <sup>-10</sup> | 0.000127395 |
| <i>CFH</i>     | rs146690273 | 1:196946050:T:G          | G                | 0.133725 | Nucleotide       | Pyrimidine Metabolism; Orotate containing            | orotidine                                          | 0.514214532  | 1.30x10 <sup>-10</sup> | 0.000127395 |
| <i>ASPM</i>    | rs75797460  | 1:197039343:G:A          | A                | 0.144775 | Nucleotide       | Purine Metabolism; (Hypo)Xanthine/Inosine containing | xanthine                                           | 0.221634851  | 5.44x10 <sup>-8</sup>  | 0.018276974 |
| <i>ASPM</i>    | rs111579393 | 1:196970745:A:C          | C                | 0.148014 | Nucleotide       | Pyrimidine Metabolism; Orotate containing            | orotidine                                          | 0.37872223   | 2.32x10 <sup>-8</sup>  | 0.012125233 |
| <i>CFH</i>     | rs146690273 | 1:196946050:T:G          | G                | 0.133725 | Nucleotide       | Purine Metabolism; (Hypo)Xanthine/Inosine containing | xanthine                                           | 0.222758661  | 5.61x10 <sup>-8</sup>  | 0.018276974 |
| <i>CFH</i>     | rs139379775 | 1:196949463:TATTATC:T    | T                | 0.147855 | Nucleotide       | Pyrimidine Metabolism; Orotate containing            | orotidine                                          | 0.380194009  | 3.57x10 <sup>-8</sup>  | 0.015513981 |
| <i>ASPM</i>    | rs111579393 | 1:196970745:A:C          | C                | 0.148014 | Nucleotide       | Pyrimidine Metabolism; Orotate containing            | orotate                                            | 0.183167006  | 2.70x10 <sup>-6</sup>  | 0.19041804  |
| <i>CFH</i>     | rs139379775 | 1:196949463:TATTATC:T    | T                | 0.147855 | Nucleotide       | Pyrimidine Metabolism; Orotate containing            | orotate                                            | 0.182783994  | 4.26x10 <sup>-6</sup>  | 0.2921833   |
| <i>CFH</i>     | rs45489701  | 1:196952268:C:T          | T                | 0.21982  | Nucleotide       | Pyrimidine Metabolism; Orotate containing            | orotidine                                          | 0.234906599  | 2.14x10 <sup>-6</sup>  | 0.179789649 |

|             |             |                 |   |          |            |                                           |           |             |           |             |
|-------------|-------------|-----------------|---|----------|------------|-------------------------------------------|-----------|-------------|-----------|-------------|
| <i>CFH</i>  | rs78077089  | 1:196952908:G:A | A | 0.219949 | Nucleotide | Pyrimidine Metabolism; Orotate containing | orotidine | 0.234906599 | 2.14x10-6 | 0.179789649 |
| <i>ASPM</i> | rs60002789  | 1:196954156:T:C | C | 0.21594  | Nucleotide | Pyrimidine Metabolism; Orotate containing | orotidine | 0.234906599 | 2.14x10-6 | 0.179789649 |
| <i>ASPM</i> | rs72468006  | 1:196955060:C:A | A | 0.219946 | Nucleotide | Pyrimidine Metabolism; Orotate containing | orotidine | 0.234906599 | 2.14x10-6 | 0.179789649 |
| <i>ASPM</i> | rs75567332  | 1:196957558:G:A | A | 0.220001 | Nucleotide | Pyrimidine Metabolism; Orotate containing | orotidine | 0.234906599 | 2.14x10-6 | 0.179789649 |
| <i>ASPM</i> | rs147817047 | 1:196957680:A:G | G | 0.220002 | Nucleotide | Pyrimidine Metabolism; Orotate containing | orotidine | 0.234906599 | 2.14x10-6 | 0.179789649 |
| <i>ASPM</i> | rs142183523 | 1:196960752:C:T | T | 0.218652 | Nucleotide | Pyrimidine Metabolism; Orotate containing | orotidine | 0.234906599 | 2.14x10-6 | 0.179789649 |
| <i>ASPM</i> | rs111822146 | 1:196963981:G:A | A | 0.220137 | Nucleotide | Pyrimidine Metabolism; Orotate containing | orotidine | 0.234906599 | 2.14x10-6 | 0.179789649 |
| <i>ASPM</i> | rs80119232  | 1:196966114:C:T | T | 0.220149 | Nucleotide | Pyrimidine Metabolism; Orotate containing | orotidine | 0.234906599 | 2.14x10-6 | 0.179789649 |
| <i>ASPM</i> | rs75282993  | 1:196966223:C:G | G | 0.218734 | Nucleotide | Pyrimidine Metabolism; Orotate containing | orotidine | 0.234906599 | 2.14x10-6 | 0.179789649 |
| <i>ASPM</i> | rs78629106  | 1:196968744:G:A | A | 0.220462 | Nucleotide | Pyrimidine Metabolism; Orotate containing | orotidine | 0.234906599 | 2.14x10-6 | 0.179789649 |
| <i>ASPM</i> | rs45445493  | 1:196978944:G:A | A | 0.218855 | Nucleotide | Pyrimidine Metabolism; Orotate containing | orotidine | 0.234906599 | 2.14x10-6 | 0.179789649 |
| <i>CFH</i>  | rs3748557   | 1:196946869:T:A | A | 0.218032 | Nucleotide | Pyrimidine Metabolism; Orotate containing | orotidine | 0.23292319  | 4.41x10-6 | 0.294811344 |
| <i>ASPM</i> | rs111379055 | 1:196977071:T:A | A | 0.224493 | Nucleotide | Pyrimidine Metabolism; Orotate containing | orotidine | 0.24047239  | 2.38x10-6 | 0.19041804  |

rsID: reference single nucleotide polymorphism (SNP) cluster ID; CHRPOS - chromosome position; GPE - glycerophosphatidylethanolamine; PT - Portugal; Meta - results from meta-analysis
