# Supplementary material
Source: PubMed Central journal article supplement (PMC9560300)
Supplement: mmc10.pdf [file mmc10.pdf]

**Supplementary Table 9. met-QTL for the Boston, United States, cohort based on False Discovery Rate (q-value < 0.05) – Controls only**

| Gene           | rsID        | CHRPOS<br>(major/ minor) | Effect<br>Allele | MAF         | Super<br>Pathway | Sub Pathway                                          | Metabolite                                     | Beta US      | P-value US | Q-value US  |
|----------------|-------------|--------------------------|------------------|-------------|------------------|------------------------------------------------------|------------------------------------------------|--------------|------------|-------------|
| <i>APOC1</i>   | rs438811    | 19:45416741:C:T          | T                | 0.241533333 | Amino Acid       | Methionine; Cysteine; SAM and Taurine Metabolism     | S-methylcysteine                               | -0.180725017 | 2.79x10-5  | 0.880365098 |
| <i>C3</i>      | rs116727573 | 19:6710153:G:A           | A                | 0.318733333 | Amino Acid       | Urea cycle; Arginine and Proline Metabolism          | N-methylproline                                | -0.461792683 | 3.85x10-5  | 0.880365098 |
| <i>C3</i>      | rs2230204   | 19:6709848:C:T           | T                | 0.321011111 | Amino Acid       | Urea cycle; Arginine and Proline Metabolism          | N-methylproline                                | -0.462285677 | 4.18x10-5  | 0.880365098 |
| <i>B3GALTL</i> | rs7989761   | 13:31819384:A:C          | C                | 0.330366667 | Amino Acid       | Urea cycle; Arginine and Proline Metabolism          | dimethylarginine (SDMA + ADMA)                 | -0.030726197 | 2.75x10-5  | 0.880365098 |
| <i>B3GALTL</i> | rs7981280   | 13:31819391:C:T          | T                | 0.330866667 | Amino Acid       | Urea cycle; Arginine and Proline Metabolism          | dimethylarginine (SDMA + ADMA)                 | -0.030726197 | 2.75x10-5  | 0.880365098 |
| <i>B3GALTL</i> | rs9564692   | 13:31821240:C:T          | T                | 0.332522222 | Amino Acid       | Urea cycle; Arginine and Proline Metabolism          | dimethylarginine (SDMA + ADMA)                 | -0.030726197 | 2.75x10-5  | 0.880365098 |
| <i>B3GALTL</i> | rs148420384 | 13:31826394:C:G          | G                | 0.332655556 | Amino Acid       | Urea cycle; Arginine and Proline Metabolism          | dimethylarginine (SDMA + ADMA)                 | -0.030726197 | 2.75x10-5  | 0.880365098 |
| <i>B3GALTL</i> | rs147567958 | 13:31826541:G:A          | A                | 0.332711111 | Amino Acid       | Urea cycle; Arginine and Proline Metabolism          | dimethylarginine (SDMA + ADMA)                 | -0.030726197 | 2.75x10-5  | 0.880365098 |
| <i>B3GALTL</i> | rs2313818   | 13:31828509:T:C          | C                | 0.332233333 | Amino Acid       | Urea cycle; Arginine and Proline Metabolism          | dimethylarginine (SDMA + ADMA)                 | -0.030726197 | 2.75x10-5  | 0.880365098 |
| <i>B3GALTL</i> | rs9572689   | 13:31829126:A:G          | G                | 0.3321      | Amino Acid       | Urea cycle; Arginine and Proline Metabolism          | dimethylarginine (SDMA + ADMA)                 | -0.030726197 | 2.75x10-5  | 0.880365098 |
| <i>B3GALTL</i> | rs2137075   | 13:31821505:A:G          | G                | 0.3334      | Amino Acid       | Urea cycle; Arginine and Proline Metabolism          | dimethylarginine (SDMA + ADMA)                 | -0.030726197 | 2.75x10-5  | 0.880365098 |
| <i>B3GALTL</i> | rs58738734  | 13:31823555:CTT:C        | C                | 0.333255556 | Amino Acid       | Urea cycle; Arginine and Proline Metabolism          | dimethylarginine (SDMA + ADMA)                 | -0.030726197 | 2.75x10-5  | 0.880365098 |
| <i>B3GALTL</i> | rs9805270   | 13:31824374:A:G          | G                | 0.333166667 | Amino Acid       | Urea cycle; Arginine and Proline Metabolism          | dimethylarginine (SDMA + ADMA)                 | -0.030726197 | 2.75x10-5  | 0.880365098 |
| <i>B3GALTL</i> | rs9805284   | 13:31824650:C:T          | T                | 0.333066667 | Amino Acid       | Urea cycle; Arginine and Proline Metabolism          | dimethylarginine (SDMA + ADMA)                 | -0.030726197 | 2.75x10-5  | 0.880365098 |
| <i>B3GALTL</i> | rs9572561   | 13:31825401:T:C          | C                | 0.332866667 | Amino Acid       | Urea cycle; Arginine and Proline Metabolism          | dimethylarginine (SDMA + ADMA)                 | -0.030726197 | 2.75x10-5  | 0.880365098 |
| <i>BTBD16</i>  | rs78200813  | 10:124106025:C:G         | G                | 0.052955556 | Carbohydrate     | Pentose Metabolism                                   | arabitol/xylitol                               | -0.088438367 | 3.38x10-5  | 0.880365098 |
| <i>CFH</i>     | rs2786107   | 1:197310777:G:T          | G                | 0.166977778 | Carbohydrate     | Glycolysis; Gluconeogenesis; and Pyruvate Metabolism | glycerate                                      | -0.06218031  | 5.69x10-5  | 0.880365098 |
| <i>ASPM</i>    | rs7549171   | 1:197177632:A:G          | G                | 0.224055556 | Lipid            | Androgenic Steroids                                  | etiocholanolone glucuronide                    | 0.155249296  | 1.18x10-5  | 0.880365098 |
| <i>HLA-B</i>   | rs147782068 | 6:31329466:A:G           | G                | 0.091311111 | Lipid            | Phosphatidylcholine (PC)                             | 1-palmitoyl-2-arachidonoyl-GPC (16:0/20:4n6)   | 0.024964264  | 5.15x10-5  | 0.880365098 |
| <i>BTBD16</i>  | rs11200571  | 10:124110966:A:G         | G                | 0.265688889 | Lipid            | Lysophospholipid                                     | 2-palmitoleoyl-GPC (16:1)*                     | 0.136482776  | 1.00x10-5  | 0.880365098 |
| <i>ASPM</i>    | rs115155369 | 1:197174647:T:C          | C                | 0.223088889 | Lipid            | Androgenic Steroids                                  | etiocholanolone glucuronide                    | 0.155249296  | 1.18x10-5  | 0.880365098 |
| <i>C3</i>      | rs2241392   | 19:6685983:G:C           | C                | 0.377688889 | Lipid            | Fatty Acid; Dicarboxylate                            | maleate                                        | 0.06625639   | 2.06x10-5  | 0.880365098 |
| <i>BTBD16</i>  | rs1973974   | 10:123998027:A:G         | G                | 0.407388889 | Lipid            | Lysophospholipid                                     | 1-palmitoleoyl-GPC (16:1)*                     | 0.044628679  | 5.56x10-5  | 0.880365098 |
| <i>BTBD16</i>  | rs7074542   | 10:124112799:C:T         | T                | 0.253655556 | Lipid            | Lysophospholipid                                     | 2-palmitoleoyl-GPC (16:1)*                     | 0.148011592  | 7.58x10-6  | 0.880365098 |
| <i>BTBD16</i>  | rs1973975   | 10:123998263:A:G         | G                | 0.400611111 | Lipid            | Lysophospholipid                                     | 1-palmitoleoyl-GPC (16:1)*                     | 0.045339804  | 4.77x10-5  | 0.880365098 |
| <i>CFH</i>     | rs73078968  | 1:196071201:G:T          | T                | 0.130711111 | Lipid            | Hexosylceramides (HCER)                              | glycosyl-N-nervonoyl-sphingosine (d18:1/24:1)* | -0.141276831 | 2.86x10-5  | 0.880365098 |
| <i>ASPM</i>    | rs1332667   | 1:196995848:G:T          | T                | 0.4993      | Lipid            | Fatty Acid Metabolism(Acyl Carnitine)                | docosahexaenoylcarnitine (C22:6)*              | -0.060251603 | 3.82x10-5  | 0.880365098 |
| <i>ASPM</i>    | rs1332668   | 1:197005736:C:T          | T                | 0.4997667   | Lipid            | Fatty Acid Metabolism(Acyl Carnitine)                | docosahexaenoylcarnitine (C22:6)*              | -0.060251603 | 3.82x10-5  | 0.880365098 |
| <i>ASPM</i>    | rs2298882   | 1:197034826:T:G          | T                | 0.499966667 | Lipid            | Fatty Acid Metabolism(Acyl Carnitine)                | docosahexaenoylcarnitine (C22:6)*              | -0.060251603 | 3.82x10-5  | 0.880365098 |
| <i>ASPM</i>    | rs4915304   | 1:197047459:A:G          | G                | 0.4999778   | Lipid            | Fatty Acid Metabolism(Acyl Carnitine)                | docosahexaenoylcarnitine (C22:6)*              | -0.060251603 | 3.82x10-5  | 0.880365098 |
| <i>ASPM</i>    | rs4915311   | 1:197048937:C:T          | T                | 0.4998889   | Lipid            | Fatty Acid Metabolism(Acyl Carnitine)                | docosahexaenoylcarnitine (C22:6)*              | -0.060251603 | 3.82x10-5  | 0.880365098 |
| <i>ASPM</i>    | rs7530902   | 1:197044716:T:A          | T                | 0.499855556 | Lipid            | Fatty Acid Metabolism(Acyl Carnitine)                | docosahexaenoylcarnitine (C22:6)*              | 0.060251603  | 3.82x10-5  | 0.880365098 |
| <i>ASPM</i>    | rs6428382   | 1:197044758:A:C          | A                | 0.499855556 | Lipid            | Fatty Acid Metabolism(Acyl Carnitine)                | docosahexaenoylcarnitine (C22:6)*              | 0.060251603  | 3.82x10-5  | 0.880365098 |
| <i>ASPM</i>    | rs3737111   | 1:197101621:T:C          | C                | 0.4991778   | Lipid            | Fatty Acid Metabolism(Acyl Carnitine)                | docosahexaenoylcarnitine (C22:6)*              | 0.060251603  | 3.82x10-5  | 0.880365098 |
| <i>ASPM</i>    | rs10712322  | 1:197004103:AC:A         | A                | 0.477377778 | Lipid            | Fatty Acid Metabolism(Acyl Carnitine)                | docosahexaenoylcarnitine (C22:6)*              | -0.057774214 | 4.86x10-5  | 0.880365098 |
| <i>ASPM</i>    | rs10737685  | 1:197004484:A:G          | G                | 0.477377778 | Lipid            | Fatty Acid Metabolism(Acyl Carnitine)                | docosahexaenoylcarnitine (C22:6)*              | -0.057774214 | 4.86x10-5  | 0.880365098 |
| <i>ASPM</i>    | rs6702252   | 1:197005212:G:A          | A                | 0.477455556 | Lipid            | Fatty Acid Metabolism(Acyl Carnitine)                | docosahexaenoylcarnitine (C22:6)*              | -0.057774214 | 4.86x10-5  | 0.880365098 |
| <i>ASPM</i>    | rs5990      | 1:197008597:A:C          | C                | 0.477744444 | Lipid            | Fatty Acid Metabolism(Acyl Carnitine)                | docosahexaenoylcarnitine (C22:6)*              | -0.057774214 | 4.86x10-5  | 0.880365098 |
| <i>ASPM</i>    | rs5998      | 1:197009798:A:G          | G                | 0.477777778 | Lipid            | Fatty Acid Metabolism(Acyl Carnitine)                | docosahexaenoylcarnitine (C22:6)*              | -0.057774214 | 4.86x10-5  | 0.880365098 |
| <i>ASPM</i>    | rs10484502  | 1:197010475:G:A          | A                | 0.477777778 | Lipid            | Fatty Acid Metabolism(Acyl Carnitine)                | docosahexaenoylcarnitine (C22:6)*              | -0.057774214 | 4.86x10-5  | 0.880365098 |
| <i>ASPM</i>    | rs10754209  | 1:197011577:T:A          | A                | 0.477788889 | Lipid            | Fatty Acid Metabolism(Acyl Carnitine)                | docosahexaenoylcarnitine (C22:6)*              | -0.057774214 | 4.86x10-5  | 0.880365098 |
| <i>ASPM</i>    | rs7518773   | 1:197011636:A:G          | G                | 0.477788889 | Lipid            | Fatty Acid Metabolism(Acyl Carnitine)                | docosahexaenoylcarnitine (C22:6)*              | -0.057774214 | 4.86x10-5  | 0.880365098 |
| <i>ASPM</i>    | rs857018    | 1:197018398:T:C          | C                | 0.477722222 | Lipid            | Fatty Acid Metabolism(Acyl Carnitine)                | docosahexaenoylcarnitine (C22:6)*              | -0.057774214 | 4.86x10-5  | 0.880365098 |
| <i>ASPM</i>    | rs1611982   | 1:197022768:G:A          | A                | 0.476977778 | Lipid            | Fatty Acid Metabolism(Acyl Carnitine)                | docosahexaenoylcarnitine (C22:6)*              | -0.057774214 | 4.86x10-5  | 0.880365098 |

|                |             |                  |   |             |            |                                           |                                             |              |           |             |
|----------------|-------------|------------------|---|-------------|------------|-------------------------------------------|---------------------------------------------|--------------|-----------|-------------|
| <i>ASPM</i>    | rs1412635   | 1:197023048:G:A  | A | 0.477677778 | Lipid      | Fatty Acid Metabolism(Acyl Carnitine)     | docosahexaenoylcarnitine (C22:6)*           | -0.057774214 | 4.86x10-5 | 0.880365098 |
| <i>ASPM</i>    | rs1332661   | 1:197029345:G:A  | A | 0.477777778 | Lipid      | Fatty Acid Metabolism(Acyl Carnitine)     | docosahexaenoylcarnitine (C22:6)*           | -0.057774214 | 4.86x10-5 | 0.880365098 |
| <i>ASPM</i>    | rs1615413   | 1:197030317:A:G  | G | 0.4778      | Lipid      | Fatty Acid Metabolism(Acyl Carnitine)     | docosahexaenoylcarnitine (C22:6)*           | -0.057774214 | 4.86x10-5 | 0.880365098 |
| <i>ASPM</i>    | rs7525490   | 1:197043922:A:G  | G | 0.478233333 | Lipid      | Fatty Acid Metabolism(Acyl Carnitine)     | docosahexaenoylcarnitine (C22:6)*           | -0.057774214 | 4.86x10-5 | 0.880365098 |
| <i>ASPM</i>    | rs6674141   | 1:197044907:A:G  | G | 0.477511111 | Lipid      | Fatty Acid Metabolism(Acyl Carnitine)     | docosahexaenoylcarnitine (C22:6)*           | -0.057774214 | 4.86x10-5 | 0.880365098 |
| <i>ASPM</i>    | rs4915308   | 1:197048609:G:A  | A | 0.477477778 | Lipid      | Fatty Acid Metabolism(Acyl Carnitine)     | docosahexaenoylcarnitine (C22:6)*           | -0.057774214 | 4.86x10-5 | 0.880365098 |
| <i>ASPM</i>    | rs7514071   | 1:197049661:T:A  | A | 0.4776      | Lipid      | Fatty Acid Metabolism(Acyl Carnitine)     | docosahexaenoylcarnitine (C22:6)*           | -0.057774214 | 4.86x10-5 | 0.880365098 |
| <i>ASPM</i>    | rs6700180   | 1:197064496:G:A  | A | 0.477411111 | Lipid      | Fatty Acid Metabolism(Acyl Carnitine)     | docosahexaenoylcarnitine (C22:6)*           | -0.057774214 | 4.86x10-5 | 0.880365098 |
| <i>ASPM</i>    | rs11330621  | 1:197064584:TA:T | T | 0.477422222 | Lipid      | Fatty Acid Metabolism(Acyl Carnitine)     | docosahexaenoylcarnitine (C22:6)*           | -0.057774214 | 4.86x10-5 | 0.880365098 |
| <i>ASPM</i>    | rs10801589  | 1:197076194:C:T  | T | 0.477322222 | Lipid      | Fatty Acid Metabolism(Acyl Carnitine)     | docosahexaenoylcarnitine (C22:6)*           | -0.057774214 | 4.86x10-5 | 0.880365098 |
| <i>ASPM</i>    | rs10922163  | 1:197077391:T:C  | C | 0.477388889 | Lipid      | Fatty Acid Metabolism(Acyl Carnitine)     | docosahexaenoylcarnitine (C22:6)*           | -0.057774214 | 4.86x10-5 | 0.880365098 |
| <i>ASPM</i>    | rs10754216  | 1:197095840:G:A  | A | 0.477       | Lipid      | Fatty Acid Metabolism(Acyl Carnitine)     | docosahexaenoylcarnitine (C22:6)*           | -0.057774214 | 4.86x10-5 | 0.880365098 |
| <i>ASPM</i>    | rs4244139   | 1:197131374:G:A  | A | 0.479155556 | Lipid      | Fatty Acid Metabolism(Acyl Carnitine)     | docosahexaenoylcarnitine (C22:6)*           | -0.057774214 | 4.86x10-5 | 0.880365098 |
| <i>ASPM</i>    | rs6677930   | 1:197135466:C:A  | A | 0.480655556 | Lipid      | Fatty Acid Metabolism(Acyl Carnitine)     | docosahexaenoylcarnitine (C22:6)*           | -0.057728946 | 4.89x10-5 | 0.880365098 |
| <i>ASPM</i>    | rs35258876  | 1:197151626:C:CA | C | 0.491155556 | Lipid      | Fatty Acid Metabolism(Acyl Carnitine)     | docosahexaenoylcarnitine (C22:6)*           | 0.064108698  | 5.21x10-5 | 0.880365098 |
| <i>C3</i>      | rs11569393  | 19:6721640:A:C   | C | 0.400266667 | Lipid      | Hexosylceramides (HCER)                   | glycosyl ceramide (d18:2/24:1; d18:1/24:2)* | -0.12081556  | 4.77x10-5 | 0.880365098 |
| <i>ASPM</i>    | rs10737688  | 1:197156055:C:T  | T | 0.4906778   | Lipid      | Fatty Acid Metabolism(Acyl Carnitine)     | docosahexaenoylcarnitine (C22:6)*           | 0.062940725  | 4.17x10-5 | 0.880365098 |
| <i>ASPM</i>    | rs10754217  | 1:197160338:C:T  | T | 0.4924667   | Lipid      | Fatty Acid Metabolism(Acyl Carnitine)     | docosahexaenoylcarnitine (C22:6)*           | 0.062940725  | 4.17x10-5 | 0.880365098 |
| <i>ASPM</i>    | rs2336596   | 1:196995092:G:A  | A | 0.498277778 | Lipid      | Fatty Acid Metabolism(Acyl Carnitine)     | docosahexaenoylcarnitine (C22:6)*           | -0.060251603 | 3.82x10-5 | 0.880365098 |
| <i>ASPM</i>    | rs7410943   | 1:197155021:A:G  | A | 0.487422222 | Lipid      | Fatty Acid Metabolism(Acyl Carnitine)     | docosahexaenoylcarnitine (C22:6)*           | 0.063779384  | 5.74x10-5 | 0.880365098 |
| <i>BTBD16</i>  | rs78200813  | 10:124106025:C:G | G | 0.052955556 | Nucleotide | Pyrimidine Metabolism; Orotate containing | orotidine                                   | 0.681594409  | 4.16x10-5 | 0.880365098 |
| <i>ABHD16A</i> | rs114407294 | 6:31672268:A:G   | G | 0.077777778 | Nucleotide | Pyrimidine Metabolism; Orotate containing | orotidine                                   | 0.412422208  | 1.04x10-5 | 0.880365098 |
| <i>ABHD16A</i> | rs28745897  | 6:31717066:C:T   | T | 0.0889      | Nucleotide | Pyrimidine Metabolism; Orotate containing | orotidine                                   | 0.399600659  | 1.90x10-5 | 0.880365098 |
| <i>ABHD16A</i> | rs17201144  | 6:31730568:A:G   | G | 0.088988889 | Nucleotide | Pyrimidine Metabolism; Orotate containing | orotidine                                   | 0.399600659  | 1.90x10-5 | 0.880365098 |
| <i>ABHD16A</i> | rs114407294 | 6:31672268:A:G   | G | 0.077777778 | Nucleotide | Pyrimidine Metabolism; Orotate containing | orotate                                     | 0.275397412  | 4.49x10-6 | 0.880365098 |
| <i>ABHD16A</i> | rs28745897  | 6:31717066:C:T   | T | 0.0889      | Nucleotide | Pyrimidine Metabolism; Orotate containing | orotate                                     | 0.26691464   | 8.77x10-6 | 0.880365098 |
| <i>ABHD16A</i> | rs17201144  | 6:31730568:A:G   | G | 0.088988889 | Nucleotide | Pyrimidine Metabolism; Orotate containing | orotate                                     | 0.26691464   | 8.77x10-6 | 0.880365098 |
| <i>ARL16</i>   | rs62075722  | 17:79611271:A:G  | A | 0.348555556 | Nucleotide | Purine Metabolism; Adenine containing     | N6-succinyladenosine                        | -0.035794731 | 2.41x10-5 | 0.880365098 |
| <i>ARL16</i>   | rs62075723  | 17:79611326:G:A  | G | 0.348633333 | Nucleotide | Purine Metabolism; Adenine containing     | N6-succinyladenosine                        | -0.035794731 | 2.41x10-5 | 0.880365098 |
| <i>ARL16</i>   | rs6420484   | 17:79612397:A:G  | A | 0.349555556 | Nucleotide | Purine Metabolism; Adenine containing     | N6-succinyladenosine                        | -0.035794731 | 2.41x10-5 | 0.880365098 |
| <i>ADAMTS9</i> | rs9311910   | 3:64707269:G:A   | G | 0.490166667 | Peptide    | Gamma-glutamyl Amino Acid                 | gamma-glutamylphenylalanine                 | -0.045751772 | 2.72x10-5 | 0.880365098 |
| <i>ADAMTS9</i> | rs9870517   | 3:64708600:A:C   | A | 0.4897      | Peptide    | Gamma-glutamyl Amino Acid                 | gamma-glutamylphenylalanine                 | -0.045751772 | 2.72x10-5 | 0.880365098 |
| <i>ADAMTS9</i> | rs918466    | 3:64710253:G:A   | G | 0.488888889 | Peptide    | Gamma-glutamyl Amino Acid                 | gamma-glutamylphenylalanine                 | -0.044322007 | 5.84x10-5 | 0.880365098 |
| <i>ADAMTS9</i> | rs6795735   | 3:64705365:C:T   | C | 0.479788889 | Peptide    | Gamma-glutamyl Amino Acid                 | gamma-glutamylphenylalanine                 | -0.043519845 | 5.46x10-5 | 0.880365098 |
| <i>ADAMTS9</i> | rs12108088  | 3:64722045:G:A   | G | 0.488055556 | Peptide    | Gamma-glutamyl Amino Acid                 | gamma-glutamylphenylalanine                 | -0.044322007 | 5.84x10-5 | 0.880365098 |
| <i>ADAMTS9</i> | rs4611812   | 3:64699445:C:T   | C | 0.482544444 | Peptide    | Gamma-glutamyl Amino Acid                 | gamma-glutamylphenylalanine                 | -0.043519845 | 5.46x10-5 | 0.880365098 |
| <i>ADAMTS9</i> | rs7638565   | 3:64723072:A:G   | G | 0.485744444 | Peptide    | Gamma-glutamyl Amino Acid                 | gamma-glutamylphenylalanine                 | -0.049133694 | 4.53x10-5 | 0.880365098 |
| <i>C3</i>      | rs199713383 | 19:6720074:A:AT  | A | 0.496155556 | Peptide    | Gamma-glutamyl Amino Acid                 | gamma-glutamylisoleucine*                   | -0.062870057 | 4.30x10-5 | 0.880365098 |
| <i>ADAMTS9</i> | rs4688508   | 3:64720023:T:C   | T | 0.4876      | Peptide    | Gamma-glutamyl Amino Acid                 | gamma-glutamylphenylalanine                 | -0.044322007 | 5.84x10-5 | 0.880365098 |

rsID: reference single nucleotide polymorphism (SNP) cluster ID; CHRPOS - chromosome position; GPE - glycerophosphatidylethanolamine; US - United States; Meta - results from meta-analysis
